# Supplementary material for: Beyond Bullying, Aggression, Discrimination, Social Safety: Development of an Integrated Negative Work Behavior Questionnaire (INWBQ)
Source: Preprints.org preprint supplement (doi:10.20944/preprints202305.1852.v1), 2023-05-26
Supplement: Supplementary file 1 [file supplementary]

**TABLE 1. 44** Construct instruments, 16 studies on digital NWB, and 32 studies on harm.

| <b>INSTRUMENTS OF NWB<br/>CONSTRUCTS (tests,<br/>questionnaires, scales)<br/>STUDIES</b> | <b>3. GOAL<br/>4. DIGITAL NWB:<br/>Cyber enabled (CE) items<sup>1</sup><br/>Cyber dependent (CD) items</b>                                                                                                                        | <b>QUESTIONS ON:<br/>3. ACTOR TYPE<br/>4. ACTOR ROLE<br/>HARM</b>              | <b>RATING SCALE:<br/>ANCHORS</b>             | <b>DURATION</b> | <b>ITEMS</b> | <b>RELIABILITY/<br/>CONSISTENCY</b> |
|------------------------------------------------------------------------------------------|-----------------------------------------------------------------------------------------------------------------------------------------------------------------------------------------------------------------------------------|--------------------------------------------------------------------------------|----------------------------------------------|-----------------|--------------|-------------------------------------|
| <b>1. AGGRESSION</b>                                                                     |                                                                                                                                                                                                                                   |                                                                                |                                              |                 |              |                                     |
| *Baron Neuman Geddes Scale (BNGS) (Baron et al., 1999)                                   | 1. study on the effect of perceived injustice on type A behavior pattern. The grater this type A the greater the engagement in this behavior. Dimensions: expressions of hostility (15), obstructions (10), overt aggression (8). | 1. workers<br>2. target<br>Harm: 0 items                                       | 1-5: Never to very often                     | Not specified   | 33           | 0.81-0.94                           |
| *Indirect Aggression Scale - Target (IAS-T) (Forrest et al., 2005)                       | 1. The development of a psychometric measure of indirect aggression for use in an adult population. 3 Dimensions: Social exclusion (10), malicious humor (9), guilt induction (6).                                                | 1. students<br>2. aggressor (IAS-A), target (IAS-T)<br>Harm: 5 double barreled | 1-5: Never to regularly                      | Past 12 months  | 25           | 0.81-0.89                           |
| *Fox & Stalworth Scale (FSS)(Fox & Stallworth, 2005)                                     | To Explore links between bullying and racism in the US workplace. Dimensions: General (25), racial (7).                                                                                                                           | 1. workers (full time)<br>2. target<br>Harm: 15 items                          | 1-5: Never to extremely often                | 5 Years         | 32           | 0.94<br>0.84                        |
| Cyber aggression, dissertation (Weatherbee, 2007)                                        | Construct development, and test of hypothesized relationships of selected variables to                                                                                                                                            | 1. coworker, supervisor, customer, person other organization                   | 1-7: Different anchors e.g., agree-disagree, | Last year       | 116          | 0.80                                |

Continued TABLE 1.

| INSTRUMENTS OF NWB<br>CONSTRUCTS (tests,<br>questionnaires, scales)<br>STUDIES                          | 1. GOAL<br>2. DIGITAL NWB:<br>Cyber enabled (CE) items <sup>1</sup><br>Cyber dependent (CD) items                                                                                                                                                                                                                 | QUESTIONS ON:<br>1. ACTOR TYPE<br>2. ACTOR ROLE<br>HARM                                | RATING SCALE:<br>ANCHORS                                              | DURATION  | ITEMS | RELIABILITY/<br>CONSISTENCY |
|---------------------------------------------------------------------------------------------------------|-------------------------------------------------------------------------------------------------------------------------------------------------------------------------------------------------------------------------------------------------------------------------------------------------------------------|----------------------------------------------------------------------------------------|-----------------------------------------------------------------------|-----------|-------|-----------------------------|
|                                                                                                         | cyberaggression (by e-mail).<br>Dimensions + items: perceived<br>cyberaggression (25), strains<br>(7), negative affective reactions<br>(19), enacted cyberaggression<br>(35), organization policy (6),<br>employer support (8).<br>2. CE natures                                                                  | 2. target, perpetrator<br>Harm: 7 items                                                | never-all of the<br>time.                                             |           |       |                             |
| Hospital Aggressive<br>Behavior Scale for<br>coworkers/superiors (HABS-<br>CS) (Waschgler et al., 2013) | 1. Brief and manageable<br>instrument for the assessment of<br>aggressive behavior risk.                                                                                                                                                                                                                          | 1. manager, workers<br>2. perpetrator<br>subordinate<br>Harm: 0 items                  | 1-6: Never to<br>daily                                                | Past year | 17    | 0,86                        |
| Healthcare-worker's<br>Aggressive Behavior Scale-<br>Users (HABS-U) (Ruiz-<br>Hernández et al., 2016)   | 1. Measure the prevalence of<br>workplace violence in primary<br>healthcare (PHC) professionals<br>by adapting the HABS-U to<br>establish the frequency of<br>exposure to hostile indicators of<br>clients and to determine which<br>professional group is most<br>exposed. Dimensions: physical,<br>nonphysical. | 1. users (clients, visitors,<br>relatives, friends)<br>2. perpetrator<br>Harm: 0 items | 1-6: Never,<br>annually,<br>quarterly,<br>monthly, weekly<br>to daily | Past year | 10    | 0.85<br>0.74                |
| 2. BULLYING                                                                                             |                                                                                                                                                                                                                                                                                                                   |                                                                                        |                                                                       |           |       |                             |

Continued TABLE 1.

| INSTRUMENTS OF NWB<br>CONSTRUCTS (tests,<br>questionnaires, scales)<br>STUDIES                   | 1. GOAL<br>2. DIGITAL NWB:<br>Cyber enabled (CE) items <sup>1</sup><br>Cyber dependent (CD) items                                                                                                                                                            | QUESTIONS ON:<br>1. ACTOR TYPE<br>2. ACTOR ROLE<br>HARM                 | RATING SCALE:<br>ANCHORS                             | DURATION         | ITEMS | RELIABILITY/<br>CONSISTENCY |
|--------------------------------------------------------------------------------------------------|--------------------------------------------------------------------------------------------------------------------------------------------------------------------------------------------------------------------------------------------------------------|-------------------------------------------------------------------------|------------------------------------------------------|------------------|-------|-----------------------------|
| * Jóhannsdóttir Ólafsson<br>Scale (JOS)(Jóhannsdóttir &<br>Ólafsson, 2004)                       | 1.Study of bullying,<br>victimization and the coping<br>strategies employed to tackle in<br>Iceland.                                                                                                                                                         | 1. bankemployees.<br>2. target<br>Harm 1 and 1 double<br>barreled item. | 1-5 Never- a few<br>times per week                   | 12 months        | 18    | 0.85<br>0.78                |
| *Workplace Bullying<br>Questinnnaire- Bullied by<br>Others (WBQ-BO) (Lee &<br>Brotheridge, 2006) | 1. Study on counter<br>aggressive/bullying behaviors<br>and certain coping responses on<br>bullying. In turn, if coping with<br>bullying predicted burnout and<br>well-being. Dimensions:<br>belittlement (13), work<br>undermined (7), verbal abuse<br>(7). | 1. workers<br>2. target<br>Harm: 0 items                                | 1-5: Not at all to<br>many times a<br>week           | 6 months         | 27    | 0.94                        |
| Negative Acts Questionnaire:<br>Revised NAQ-R, (Einarsen<br>et al., 2009)                        | 1. Together with its earlier<br>version, NAQ explores<br>workplace bullying exposure,<br>both in applied and scientific<br>research. Dimensions bullying +<br>items: work related (7), person<br>related (12), physically<br>intimidating (3).               | 1. coworker<br>2. target<br>Harm: 1 double barreled<br>Item.            | 1-4: Never,<br>almost never,<br>once a week,<br>more | Past 6<br>months | 22    | 0.90                        |
| Cyber NAQ (Privitera &<br>Campbell, 2009)                                                        | 1.Investigate the prevalence and<br>methods of face-to-face                                                                                                                                                                                                  | 1. coworker<br>2. target                                                | 1-6: No, yes:<br>very rarely, now                    | Past 6<br>months | 18    | 0.94                        |

Continued TABLE 1.

| INSTRUMENTS OF NWB<br>CONSTRUCTS (tests,<br>questionnaires, scales)<br>STUDIES                         | 1. GOAL<br>2. DIGITAL NWB:<br>Cyber enabled (CE) items <sup>1</sup><br>Cyber dependent (CD) items                                                                                                                                                     | QUESTIONS ON:<br>1. ACTOR TYPE<br>2. ACTOR ROLE<br>HARM                                     | RATING SCALE:<br>ANCHORS                                                                | DURATION         | ITEMS | RELIABILITY/<br>CONSISTENCY |
|--------------------------------------------------------------------------------------------------------|-------------------------------------------------------------------------------------------------------------------------------------------------------------------------------------------------------------------------------------------------------|---------------------------------------------------------------------------------------------|-----------------------------------------------------------------------------------------|------------------|-------|-----------------------------|
|                                                                                                        | bullying and cyberbullying of<br>males at work. Instrument asks<br>negative acts related to work<br>through different forms of<br>technology.<br>2. CE all items                                                                                      | Harm: 1 item                                                                                | and then, several<br>times per month,<br>several times per<br>week, and almost<br>daily |                  |       |                             |
| *Escala de Abuso<br>Psicológico Aplicado en el<br>Lugar de Trabajo (EAPA-T)<br>(Escartín et al., 2010) | 1 Development and validation<br>of a new measure of workplace<br>bullying instrument.                                                                                                                                                                 | 1. workers<br>2. target<br>Harm: 1 double barreled<br>item.                                 | 1-4: Never to<br>daily                                                                  | 6 months         | 12    | 0.89<br>0.72                |
| *Patchin & Hinduja Cyber<br>bullying scale (PHCS)<br>(Patchin & Hinduja, 2015)                         | 1. Review the essential elements<br>of cyberbullying that distinguish<br>it from other peer-to-peer online<br>interactions and present a<br>cyberbullying scale.<br>Dimensions: offender and<br>victimization scale.<br>2. CE: 34 items, CD: 2 items. | 1. students<br>2. offender, victim<br>Harm: 10 double barreled<br>questions on hurtfulness. | 1-4: Never to<br>many times                                                             | Past 6<br>months | 36    | 0.89-0.93<br>0.93-0.96      |
| Workplace Cyberbullying<br>Measure (WCM) (Farley et<br>al., 2016)                                      | 1. Develop a valid and reliable<br>measure to assess cyberbullying<br>across various communication<br>technologies and disparate<br>working populations.                                                                                              | 1. coworker<br>2. target<br>Harm: 1 item                                                    | 1-5: Never, now<br>and then, at least<br>monthly, at least<br>weekly, daily             | Past 6<br>months | 26    | 0.93                        |

Continued TABLE 1.

| INSTRUMENTS OF NWB<br>CONSTRUCTS (tests,<br>questionnaires, scales)<br>STUDIES      | 1. GOAL<br>2. DIGITAL NWB:<br>Cyber enabled (CE) items <sup>1</sup><br>Cyber dependent (CD) items                                                                                                                                                                            | QUESTIONS ON:<br>1. ACTOR TYPE<br>2. ACTOR ROLE<br>HARM                                                  | RATING SCALE:<br>ANCHORS                                      | DURATION         | ITEMS | RELIABILITY/<br>CONSISTENCY                    |
|-------------------------------------------------------------------------------------|------------------------------------------------------------------------------------------------------------------------------------------------------------------------------------------------------------------------------------------------------------------------------|----------------------------------------------------------------------------------------------------------|---------------------------------------------------------------|------------------|-------|------------------------------------------------|
|                                                                                     | 2. CE 14 items, 12 face-to face                                                                                                                                                                                                                                              |                                                                                                          |                                                               |                  |       |                                                |
| Bullying Participants<br>Behavior Questionnaire<br>(BPPBQ)(Demaray et al.,<br>2016) | 1. To establish reliability and<br>validity of this self-report<br>survey examining various<br>bullying participant role<br>behaviors.                                                                                                                                       | 1. students<br>2. bully, victim,<br>assistant, victim,<br>defender victim,<br>outsider.<br>Harm: 0 items | 1-5: Never, 1-2<br>times, 3-5 times,<br>6 times, 7 or<br>more | Last 30 days     | 80    | 0.88<br>0.94                                   |
| CBQ and CBQ-S (short)<br>(Jönsson et al., 2017)                                     | 1. Analyze the reliability and<br>validity of a cyberbullying<br>behavior questionnaire (CBQ)<br>and to analyze the reliability<br>and validity of a short version<br>of a cyberbullying behavior<br>questionnaire (CBQ-S) in<br>working life<br>2. CE:17 items, CD: 3 items | 1. coworker<br>2. target<br>Harm:0 items                                                                 | 1-5: Never, now<br>and then,<br>monthly, weekly,<br>daily     | Past 6<br>months | 20    | 0.96<br>Both<br>samples<br><br>Short:<br>0.88  |
| ICA-W (Vranjes et al., 2018)                                                        | 1. To construct and validate the<br>Inventory of Cyberbullying<br>Acts at Work.<br>2. CE: 8 items, CD: 2 items                                                                                                                                                               | 1. coworker<br>2. target<br>Harm: 1 item                                                                 | 1-6: Never to<br>always                                       | Past 6<br>months | 10    | 0.78<br>0.72<br>0.78<br>Full<br>scale:<br>0.81 |
| <b>Study digital bullying</b>                                                       |                                                                                                                                                                                                                                                                              |                                                                                                          |                                                               |                  |       |                                                |

Continued TABLE 1.

| INSTRUMENTS OF NWB<br>CONSTRUCTS (tests,<br>questionnaires, scales)<br>STUDIES                                                                                                                                                                   | 1. GOAL<br>2. DIGITAL NWB:<br>Cyber enabled (CE) items <sup>1</sup><br>Cyber dependent (CD) items                                                                                                                                                                                                                                                                                                                                                                                                                             | QUESTIONS ON:<br>1. ACTOR TYPE<br>2. ACTOR ROLE<br>HARM                                                                                                                                                                                                                                                                                                                                                                                                                             | RATING SCALE:<br>ANCHORS | DURATION                                                         | ITEMS | RELIABILITY/<br>CONSISTENCY |
|--------------------------------------------------------------------------------------------------------------------------------------------------------------------------------------------------------------------------------------------------|-------------------------------------------------------------------------------------------------------------------------------------------------------------------------------------------------------------------------------------------------------------------------------------------------------------------------------------------------------------------------------------------------------------------------------------------------------------------------------------------------------------------------------|-------------------------------------------------------------------------------------------------------------------------------------------------------------------------------------------------------------------------------------------------------------------------------------------------------------------------------------------------------------------------------------------------------------------------------------------------------------------------------------|--------------------------|------------------------------------------------------------------|-------|-----------------------------|
| <p>Internet bullying (Gofin &amp; Avitzour, 2012)</p> <p><b>Studies harm</b><br/>Workplace bullying and the risk of cardiovascular disease and depression (Kivimaki et al., 2003)</p> <p>The costs of workplace bullying (Giga et al., 2008)</p> | <p>1. To examine the prevalence of traditional and Internet bullying and the personal, family, and school environment characteristics of perpetrators and victims.</p> <p>1.To investigate the association between prolonged bullying and incident depression, and incident cardiovascular disease.</p> <p>1. The use of wide-ranging secondary data sources to extrapolate individual and organizational costs associated with workplace bullying using direct (bullying) and indirect (stress and violence) literature.</p> | <p>1. students 12-14 junior high schools<br/>2. perpetrator, victim</p> <p>1. hospital employees<br/>2. target</p> <p>Personal costs: Loss of income, additional medical and hospital treatment, costs family. Organizational costs: sickness absence, replacement costs incurred by employee turnover, reduced productivity/performance, knock on effects on witnesses or observers of bullying, premature retirement, grievance and complaints, litigation, and compensation,</p> |                          | <p>hours of internet use a day 1/2–1 h, 1–2 h, more than 2 h</p> |       |                             |

Continued TABLE 1.

| INSTRUMENTS OF NWB<br>CONSTRUCTS (tests,<br>questionnaires, scales)<br>STUDIES                                                                                                            | 1. GOAL<br>2. DIGITAL NWB:<br>Cyber enabled (CE) items <sup>1</sup><br>Cyber dependent (CD) items                                                                                                      | QUESTIONS ON:<br>1. ACTOR TYPE<br>2. ACTOR ROLE<br>HARM                                                                                                                                                                                                 | RATING SCALE:<br>ANCHORS | DURATION | ITEMS | RELIABILITY/<br>CONSISTENCY |
|-------------------------------------------------------------------------------------------------------------------------------------------------------------------------------------------|--------------------------------------------------------------------------------------------------------------------------------------------------------------------------------------------------------|---------------------------------------------------------------------------------------------------------------------------------------------------------------------------------------------------------------------------------------------------------|--------------------------|----------|-------|-----------------------------|
| Exposure to negative acts at work, psychological stress reactions and physiological stress response (Hogh et al., 2012)                                                                   | 1. To test the association between exposure to negative acts at work, psychological stress-reactions and cortisol secretion and whether some negative acts are more detrimental to health than others. | organizational intervention.<br><br>1. employees of several public and private sectors.<br>1. target<br>NAQ-R +2 ostracism items, Impact of Event Scale (IES) measured psychological stress (Weiss & Marmar, 1997), Saliva samples to measure cortisol. |                          |          |       |                             |
| The impact of by standing to workplace bullying on symptoms of depression among women and men in industry in Sweden: an empirical and theoretical longitudinal study (Emdad et al., 2013) | 1. To investigate the work environmental risk factors of depressive symptoms among bystanders to bullying in both women and men in four large industrial organizations in Sweden.                      | 1. employees<br>2. bystanders (witness)<br>Harm: depressive symptoms measured with the Hospital Anxiety and Depression Scale (HAD depression)                                                                                                           |                          |          |       |                             |
| Workplace bullying and sleep difficulties: a 2-year follow-up study (Hansen et al., 2014)                                                                                                 | 1.To investigate whether being subjected to bullying and witnessing bullying at the                                                                                                                    | 1. workers of public and private workplaces in Denmark<br>2. target, witness                                                                                                                                                                            |                          |          |       |                             |

Continued TABLE 1.

| INSTRUMENTS OF NWB<br>CONSTRUCTS (tests,<br>questionnaires, scales)<br>STUDIES                                                                                                                                                                                                                      | 1. GOAL<br>2. DIGITAL NWB:<br>Cyber enabled (CE) items <sup>1</sup><br>Cyber dependent (CD) items                                                                                                                                                                                                                                                                                                                                                                                                                                                                                                                       | QUESTIONS ON:<br>1. ACTOR TYPE<br>2. ACTOR ROLE<br>HARM                                                                                                                                                                                                         | RATING SCALE:<br>ANCHORS | DURATION | ITEMS | RELIABILITY/<br>CONSISTENCY |
|-----------------------------------------------------------------------------------------------------------------------------------------------------------------------------------------------------------------------------------------------------------------------------------------------------|-------------------------------------------------------------------------------------------------------------------------------------------------------------------------------------------------------------------------------------------------------------------------------------------------------------------------------------------------------------------------------------------------------------------------------------------------------------------------------------------------------------------------------------------------------------------------------------------------------------------------|-----------------------------------------------------------------------------------------------------------------------------------------------------------------------------------------------------------------------------------------------------------------|--------------------------|----------|-------|-----------------------------|
| <p>Workplace bullying and mental health: A meta-analysis on cross-sectional and longitudinal data. (Verkuil et al., 2015)</p> <p>Workplace bullying in a sample of Italian and Spanish employees and its relationship with job satisfaction, and psychological well-being (Arenas et al., 2015)</p> | <p>workplace was associated with concurrent sleep difficulties.</p> <p>1. To examine the relation between workplace bullying and mental health, by pooling the available cross-sectional and longitudinal data (70 samples and a total of 170.233 participants), consisting of three categories: (1) symptoms of depression, (2) symptoms of anxiety, and (3) stress-related psychological complaints, such as negative affect and emotional exhaustion.</p> <p>1. To examine the prevalence rate of workplace bullying with differential consequences on employees' job satisfaction and psychological well-being.</p> | <p>1. employees<br/>2. targets</p> <p>Harm: widely used scales to measure job induced stress job satisfaction, intention to leave the job / profession, anxiety, depression, PTSD, burnout.</p> <p>1. sample of Italian and Spanish employees<br/>2. target</p> |                          |          |       |                             |



Continued TABLE 1.

| INSTRUMENTS OF NWB<br>CONSTRUCTS (tests,<br>questionnaires, scales)<br>STUDIES                                               | 1. GOAL<br>2. DIGITAL NWB:<br>Cyber enabled (CE) items <sup>1</sup><br>Cyber dependent (CD) items                                                                                                                            | QUESTIONS ON:<br>1. ACTOR TYPE<br>2. ACTOR ROLE<br>HARM                                                                                                                                                                                                                                    | RATING SCALE:<br>ANCHORS | DURATION | ITEMS | RELIABILITY/<br>CONSISTENCY |
|------------------------------------------------------------------------------------------------------------------------------|------------------------------------------------------------------------------------------------------------------------------------------------------------------------------------------------------------------------------|--------------------------------------------------------------------------------------------------------------------------------------------------------------------------------------------------------------------------------------------------------------------------------------------|--------------------------|----------|-------|-----------------------------|
| Workplace bullying as a predictor of disability retirement (Nielsen et al., 2017)                                            | 1.To determine whether bullying is related to all-cause disability retirement, contributes to disability retirement above high job demands and lack of job control, and to establish gender differences in the relationship. | 1. Norwegian employees with disability pension<br>2. target<br>respondents were asked whether they had been subjected to bullying at the workplace during the last 6 months with yes and no. Bullying definition was offered before. Job control measured with QPS (Dallner et al., 2000). |                          |          |       |                             |
| Workplace bullying and violence as risk factors for type 2 diabetes: a multicohort study and meta-analysis (Xu et al., 2018) | 1. Multicohort study to examine if employees exposed to workplace bullying and violence, have an increased risk of type 2 diabetes.                                                                                          | 1. Workers: men and women (40– 65 years) free of diabetes in Sweden, Denmark and Finland<br>2. target<br>Bullying and violence were self-reported at baseline + national health and medication records and death registers.                                                                |                          |          |       |                             |
|                                                                                                                              |                                                                                                                                                                                                                              |                                                                                                                                                                                                                                                                                            |                          |          |       |                             |

Continued TABLE 1.

| INSTRUMENTS OF NWB<br>CONSTRUCTS (tests,<br>questionnaires, scales)<br>STUDIES | 1. GOAL<br>2. DIGITAL NWB:<br>Cyber enabled (CE) items <sup>1</sup><br>Cyber dependent (CD) items                                                                                                                                                                                                            | QUESTIONS ON:<br>1. ACTOR TYPE<br>2. ACTOR ROLE<br>HARM                                                   | RATING SCALE:<br>ANCHORS                                                           | DURATION  | ITEMS | RELIABILITY/<br>CONSISTENCY |
|--------------------------------------------------------------------------------|--------------------------------------------------------------------------------------------------------------------------------------------------------------------------------------------------------------------------------------------------------------------------------------------------------------|-----------------------------------------------------------------------------------------------------------|------------------------------------------------------------------------------------|-----------|-------|-----------------------------|
| <b>MOBBING</b><br>Mobbing with effects on the<br>victim (Leymann, 1996)        | 1. Research to develop a<br>typology of mobbing activities,<br>subdivided into five dimensions<br>depending on the effects they<br>have on the victim.                                                                                                                                                       | 1. coworker<br>2. target<br>Harm :5 double barreled<br>items (all)                                        | No anchors                                                                         | 6 months  | 5     | Not<br>identified           |
| Leidse Mobbing Schaal-II.<br>(LEMS -II) (Hubert & Furda,<br>1996)              | 1. Measures the extent of<br>bullying at work and harm.                                                                                                                                                                                                                                                      | 1. coworker<br>2. target<br>Harm: 12 items                                                                | 1-5: Never,<br>rarely, at least<br>once a month, at<br>least once a<br>week, daily | Past year | 12    | 0.71-0.88                   |
| LIPT-60 scale (Rivera &<br>Abuín, 2003)                                        | 1. Translation, validation of<br>Leymann's LIPT-60<br>questionnaire, extra items<br>added, 6 dimensions: 1. job<br>discrediting, 2. hindering<br>progress, 3. communication<br>blockage or blocking of<br>communication, 4. covert<br>intimidation, 5. overt<br>intimidation and 6 personal<br>discrediting. | 1. coworker<br>2. target<br>Harm: 11 items<br>Turkish version<br>health workers<br>(Körükçü et al., 2014) | 0-4 Not at all., a<br>little, moderately,<br>very much,<br>extremely.              | Past year | 60    | 0.79                        |
| <b>Studies digital mobbing</b><br>Cyber-mobbing (Fawzi,<br>2009)               | 1. Systematic and differentiated<br>questions on targets and experts                                                                                                                                                                                                                                         | 1. coworker<br>2. target                                                                                  |                                                                                    |           |       |                             |

Continued TABLE 1.

| INSTRUMENTS OF NWB<br>CONSTRUCTS (tests,<br>questionnaires, scales)<br>STUDIES                                                                                                                                                                                                  | 1. GOAL<br>2. DIGITAL NWB:<br>Cyber enabled (CE) items <sup>1</sup><br>Cyber dependent (CD) items                                                                                                                                                                                                                                                                                                                                                                                                                                                           | QUESTIONS ON:<br>1. ACTOR TYPE<br>2. ACTOR ROLE<br>HARM                                                                                                                                                                                                                                                                                  | RATING SCALE:<br>ANCHORS | DURATION | ITEMS | RELIABILITY/<br>CONSISTENCY |
|---------------------------------------------------------------------------------------------------------------------------------------------------------------------------------------------------------------------------------------------------------------------------------|-------------------------------------------------------------------------------------------------------------------------------------------------------------------------------------------------------------------------------------------------------------------------------------------------------------------------------------------------------------------------------------------------------------------------------------------------------------------------------------------------------------------------------------------------------------|------------------------------------------------------------------------------------------------------------------------------------------------------------------------------------------------------------------------------------------------------------------------------------------------------------------------------------------|--------------------------|----------|-------|-----------------------------|
| <p>Blackmail (Da Silva João &amp; Saldanha Portelada, 2019):</p> <p><b>Study harm</b><br/>Helsemessige aspekter ved mobbing i arbeidslivet: Modererende effekter av sosial støtte og personlighet (Einarsen et al., 1996)</p> <p>Mobbing at workplace- psychological trauma</p> | <p>for an overview on the state-of-the-art research of cyber mobbing.</p> <p>1. Assess the existence, frequency, and intensity of mobbing within the Portuguese nurse population, as well as its impact on their well-being and interpersonal relationships.<br/>2. CE</p> <p>1.To investigate the relationships between exposure to bullying and self-reported health complaints and whether these relationships are moderated by social support and aspects of the victims' personality.</p> <p>1. To identify the features of trauma and analyze the</p> | <p>1. people in general<br/>2. perpetrator</p> <p>1. workers union members, management<br/>2. target</p> <p>The questionnaire included demographic variables, questions on workplace bullying and harassment, several personality scales, health-related measures, and work environment indicators.</p> <p>1. Patiënts<br/>2. Target</p> |                          |          |       |                             |

Continued TABLE 1.

| INSTRUMENTS OF NWB<br>CONSTRUCTS (tests,<br>questionnaires, scales)<br>STUDIES                           | 1. GOAL<br>2. DIGITAL NWB:<br>Cyber enabled (CE) items <sup>1</sup><br>Cyber dependent (CD) items                                                                                                                                                            | QUESTIONS ON:<br>1. ACTOR TYPE<br>2. ACTOR ROLE<br>HARM                                                                                            | RATING SCALE:<br>ANCHORS             | DURATION          | ITEMS | RELIABILITY/<br>CONSISTENCY |
|----------------------------------------------------------------------------------------------------------|--------------------------------------------------------------------------------------------------------------------------------------------------------------------------------------------------------------------------------------------------------------|----------------------------------------------------------------------------------------------------------------------------------------------------|--------------------------------------|-------------------|-------|-----------------------------|
| And documentation of<br>psychiatric symptoms (Baran<br>Tatar & Yuksel, 2018)                             | development of mental<br>problems caused by traumatic<br>experiences in individuals who<br>have been subjected to mobbing<br>at workplace and admitted to<br>psychiatry services.                                                                            | Trauma Evaluation Form<br>(TIF), Posttraumatic<br>Stress Diagnostic Scale<br>(PDS), Impact of Event<br>Scale- Revised (IES-R)<br>were administered |                                      |                   |       |                             |
| <b>3. HARASSMENT/<br/>DISCRIMINATION</b><br>*Work Harassment<br>Scale (WHS) (Bjorkqvist et<br>al., 1994) | A series of studies, labeled the<br>"Work Harassment Project,"<br>was initiated to investigate the<br>prevalence of work harassment<br>in various types of workplaces<br>in Finland. Aggressor-victim<br>relationships in this study were<br>a part of this. | 1. university workers<br>2. target<br>Harm: 0 items                                                                                                | 0-4: Never, very<br>often            | 6 Months          | 24    | 0,95                        |
| Ethnic Harassment<br>Experiences scale (EHE)<br>(Schneider et al., 2000)                                 | 1. Examines the nature and<br>correlates of the ethnic<br>harassment experiences (i.e.,<br>verbal ethnic harassment and<br>exclusion due to ethnicity).                                                                                                      | 1. coworker<br>2. target<br>Harm: 0 items                                                                                                          | 1-5: Never to<br>almost always       | Past 24<br>months | 7     | 0.95<br>0.90                |
| Generalized Workplace<br>Harassment Questionnaire                                                        | 1. To measure any negative or<br>hostile workplace interpersonal<br>interactions experienced by an                                                                                                                                                           | 1. coworker<br>2. target<br>Harm: 1 item                                                                                                           | 1-3: Never, once<br>more than twice. | Past year         | 29    | 0.92                        |

Continued TABLE 1.

| INSTRUMENTS OF NWB<br>CONSTRUCTS (tests,<br>questionnaires, scales)<br>STUDIES | 1. GOAL<br>2. DIGITAL NWB:<br>Cyber enabled (CE) items <sup>1</sup><br>Cyber dependent (CD) items                                                                                                                                                                                            | QUESTIONS ON:<br>1. ACTOR TYPE<br>2. ACTOR ROLE<br>HARM                      | RATING SCALE:<br>ANCHORS                                           | DURATION  | ITEMS | RELIABILITY/<br>CONSISTENCY        |
|--------------------------------------------------------------------------------|----------------------------------------------------------------------------------------------------------------------------------------------------------------------------------------------------------------------------------------------------------------------------------------------|------------------------------------------------------------------------------|--------------------------------------------------------------------|-----------|-------|------------------------------------|
| (GWHQ) (Rospenda & Richman, 2004)                                              | employee not based on social characteristics such as gender, race ethnic or other social status characteristics that are legally. Five dimensions + items: verbal aggression (9), disrespect (9), isolation/exclusion (5), threats/bribes (3), and physical aggression (3).                  |                                                                              |                                                                    |           |       |                                    |
| Cyber harassment (Beran & Li, 2005)                                            | 1. Measures the form of harassment that occurs using electronic communications such as e-mail and cell phones. Dimensions + items: medium (3), harm (10), combi with vis-à-vis (1), actor type (2). Questions were open ended on type of technology, closed on frequency.<br>2. CE: 3 items: | 1. students grade 7-9<br>2. target, perpetrator, bystander<br>Harm: 10 items | 1-5: Never, once, twice, a few times, many times, almost every day | Past Year | 15    | 0.88                               |
| Gender Experience Questionnaire (SEQ)(Leskinen & Cortina, 2014)                | 1. Measurement of workplace gender harassment, beyond sexual insults to include hostility targeting one's gender,                                                                                                                                                                            | 1. coworker<br>2. target<br>Harm: 0 items                                    | 1-5: Never, once, or twice, sometimes, often, many times           | Past year | 20    | 0.85<br>0.90<br>0.92<br>Full scale |

Continued TABLE 1.

| INSTRUMENTS OF NWB<br>CONSTRUCTS (tests,<br>questionnaires, scales)<br>STUDIES                                                                                                                                                                                                                                                                                                              | 1. GOAL<br>2. DIGITAL NWB:<br>Cyber enabled (CE) items <sup>1</sup><br>Cyber dependent (CD) items                                                                                                                                                                                                                                                                                                                                                                                                                                                                      | QUESTIONS ON:<br>1. ACTOR TYPE<br>2. ACTOR ROLE<br>HARM                                                                                                                                                                                                                                                                                                                 | RATING SCALE:<br>ANCHORS             | DURATION                            | ITEMS | RELIABILITY/<br>CONSISTENCY |
|---------------------------------------------------------------------------------------------------------------------------------------------------------------------------------------------------------------------------------------------------------------------------------------------------------------------------------------------------------------------------------------------|------------------------------------------------------------------------------------------------------------------------------------------------------------------------------------------------------------------------------------------------------------------------------------------------------------------------------------------------------------------------------------------------------------------------------------------------------------------------------------------------------------------------------------------------------------------------|-------------------------------------------------------------------------------------------------------------------------------------------------------------------------------------------------------------------------------------------------------------------------------------------------------------------------------------------------------------------------|--------------------------------------|-------------------------------------|-------|-----------------------------|
| <p><b>Study digital discrimination</b><br/>Discriminating systems: Gender, race, and power in AI (West et al., 2019).</p> <p><b>Studies harm</b><br/>Harassment as predictor of burnout (Savicki et al., 2003)<br/>Local harassment scale on race, religion, gender, national origin (6 items)</p> <p>Associations of workplace bullying and harassment with pain (Takaki et al., 2013)</p> | <p>gender role (non)conformity, and motherhood status.</p> <p>1.Study on algorithms build in AI systems discriminating on gender, race, and power. A diversity crisis in the AI industry and the problems of bias in AI systems are interrelated aspects.</p> <p>2.CD</p> <p>To examine the impact of harassment on important aspects of job experience in correctional settings: burnout, commitment to the organization, and perceived stress.</p> <p>1.To investigate associations of workplace bullying and harassment with headache, stiffness of the neck or</p> | <p>1. developer, institute, customers</p> <p>2. customer of site as target, institute as perpetrator</p> <p>1. correctional officers</p> <p>2. target</p> <p>Harm: locally constructed 6 item scale on harassment based on based on race, religion, gender, or national origin; Maslach Burnout Inventory (Maslach et al., 1997)</p> <p>1. workers</p> <p>2. target</p> | <p>analyzing existing IT systems</p> | <p>Year-long pilot review study</p> |       |                             |

Continued TABLE 1.

| INSTRUMENTS OF NWB<br>CONSTRUCTS (tests,<br>questionnaires, scales)<br>STUDIES                                              | 1. GOAL<br>2. DIGITAL NWB:<br>Cyber enabled (CE) items <sup>1</sup><br>Cyber dependent (CD) items                                                                                                                 | QUESTIONS ON:<br>1. ACTOR TYPE<br>2. ACTOR ROLE<br>HARM                                                                                                                                                                                                                                                                                                                                            | RATING SCALE:<br>ANCHORS                                 | DURATION  | ITEMS | RELIABILITY/<br>CONSISTENCY |
|-----------------------------------------------------------------------------------------------------------------------------|-------------------------------------------------------------------------------------------------------------------------------------------------------------------------------------------------------------------|----------------------------------------------------------------------------------------------------------------------------------------------------------------------------------------------------------------------------------------------------------------------------------------------------------------------------------------------------------------------------------------------------|----------------------------------------------------------|-----------|-------|-----------------------------|
| Association of sexual harassment and sexual assault with midlife women's mental and physical health (Thurston et al., 2019) | shoulders, lumbago, and pain of two or more joints.<br><br>1. To investigate the association of history of sexual harassment and sexual assault with bloodpressure, mood, anxiety, and sleep among midlife women. | NAQ-R + Brief Job Stress Questionnaire(BJSQ, (Shimomitsu et al., 2000)<br><br>1. nonsmoking women aged 40 to 60 years free of clinical cardiovascular disease. Pittsburg, Pennsylvania<br>2. Target<br>Telephone screening Brief Trauma Questionnaire (Koenen et al., 2009), items from the Workplace Sexual Harassment and assault (Breiding et al., 2014) +several physical measurement methods. |                                                          |           |       |                             |
| <b>4. DEVIANCE</b><br>Interpersonal and Organizational Deviance Scale (IODS) (Bennett & Robinson, 2000)                     | 1. Research to develop broad, theoretically derived measure(s) of deviant behavior in the workplace.                                                                                                              | 1. coworker<br>2. perpetrator<br>Harm: 0 items                                                                                                                                                                                                                                                                                                                                                     | 1-7: Never to once a year, twice a year, several times a | Last Year | 19    | 0.87<br>0.90<br>0.88        |

Continued TABLE 1.

| INSTRUMENTS OF NWB<br>CONSTRUCTS (tests,<br>questionnaires, scales)<br>STUDIES                                  | 1. GOAL<br>2. DIGITAL NWB:<br>Cyber enabled (CE) items <sup>1</sup><br>Cyber dependent (CD) items                                                                                                                                                                                                                                         | QUESTIONS ON:<br>1. ACTOR TYPE<br>2. ACTOR ROLE<br>HARM | RATING SCALE:<br>ANCHORS                                                                                                                                    | DURATION                   | ITEMS | RELIABILITY/<br>CONSISTENCY |
|-----------------------------------------------------------------------------------------------------------------|-------------------------------------------------------------------------------------------------------------------------------------------------------------------------------------------------------------------------------------------------------------------------------------------------------------------------------------------|---------------------------------------------------------|-------------------------------------------------------------------------------------------------------------------------------------------------------------|----------------------------|-------|-----------------------------|
| Cyber loafing (Lim, 2002)                                                                                       | 1. Study on internet access at work for personal use while pretending to do legitimate work. Measuring engagement in type of cyber loafing if workers experience injustice Justice dimensions + items: distributive (5), procedural (7), interactive (6), forms of cyber loafing (11). 11 CE items of visits on private websites and mail | 1. coworker<br>2. perpetrator<br>Harm: 0 items          | year, monthly,<br>weekly, daily<br><br>A/B 5: Very<br>unfair to very fair<br>C 5: Strongly<br>disagree to<br>strongly agree.<br>D 5: Never to<br>constantly | During<br>working<br>hours | 29    | 0.93                        |
| Work related Social Media<br>Questionnaire (WSMQ)<br>(Landers & Callan, 2014)                                   | 1. Measure internet surfing during work hours for personal interest, misuse of companies' internet access<br>2.on CD nature                                                                                                                                                                                                               | 1. coworker<br>2. perpetrator                           | 1-5: Strongly<br>disagree- strongly<br>agree.                                                                                                               | Last year                  | 9     | 0.76<br>0.78                |
| <b>5. CWB</b><br>Counterproductive Work<br>Behavior Checklist -long<br>version (CWB-C) (Fox &<br>Spector, 2002) | 1. Measure acts that harm or are intended to harm organizations. They include acts directed toward both organizations and individuals, including                                                                                                                                                                                          | 1. coworker<br>2. perpetrator<br>Harm: 0 items          | 1-5: Never once<br>or twice,<br>Once or twice per<br>month,                                                                                                 | During their<br>job        | 45    | 0.87                        |



Continued TABLE 1.

| INSTRUMENTS OF NWB<br>CONSTRUCTS (tests,<br>questionnaires, scales)<br>STUDIES                                                                                                                                                      | 1. GOAL<br>2. DIGITAL NWB:<br>Cyber enabled (CE) items <sup>1</sup><br>Cyber dependent (CD) items                                                                             | QUESTIONS ON:<br>1. ACTOR TYPE<br>2. ACTOR ROLE<br>HARM | RATING SCALE:<br>ANCHORS              | DURATION  | ITEMS | RELIABILITY/<br>CONSISTENCY |
|-------------------------------------------------------------------------------------------------------------------------------------------------------------------------------------------------------------------------------------|-------------------------------------------------------------------------------------------------------------------------------------------------------------------------------|---------------------------------------------------------|---------------------------------------|-----------|-------|-----------------------------|
| <b>Studies digital CWB</b><br>Cyber fraud (Trembly, 2004)                                                                                                                                                                           | aggression (physical and verbal), sabotage, theft, and withdrawal.<br><br>1. Internet communications are not private. 2. CD nature                                            | 1. internet users targets                               | Once or twice per week,<br>Every day. |           |       | Analyzed court cases.       |
| Mail and wire fraud (Neese et al., 2005),                                                                                                                                                                                           | 1. False statements provided to customers, marketing channel members, and the government. Analysis of federal mail and wire fraud cases related to marketing.<br>2. CE nature | 1. marketers<br>2. perpetrators                         |                                       |           |       |                             |
| <b>Study harm</b><br>Explaining counterproductive work behaviors among police officers: The indirect effects of job demands are mediated by job burnout and moderated by job control and social support (Smoktunowicz et al., 2015) | 1. Part of this study was to investigate the relation of job-demands and CWB on job burnout.                                                                                  | 1. police officers<br>2. target                         |                                       |           |       |                             |
| <b>6. VIOLENCE</b>                                                                                                                                                                                                                  |                                                                                                                                                                               | 1. individual/group                                     |                                       | Last year | 11    |                             |

Continued TABLE 1.

| INSTRUMENTS OF NWB<br>CONSTRUCTS (tests,<br>questionnaires, scales)<br>STUDIES                                                          | 1. GOAL<br>2. DIGITAL NWB:<br>Cyber enabled (CE) items <sup>1</sup><br>Cyber dependent (CD) items                                                                                                                                                          | QUESTIONS ON:<br>1. ACTOR TYPE<br>2. ACTOR ROLE<br>HARM                           | RATING SCALE:<br>ANCHORS                                                                                                                                                                                          | DURATION | ITEMS | RELIABILITY/<br>CONSISTENCY |
|-----------------------------------------------------------------------------------------------------------------------------------------|------------------------------------------------------------------------------------------------------------------------------------------------------------------------------------------------------------------------------------------------------------|-----------------------------------------------------------------------------------|-------------------------------------------------------------------------------------------------------------------------------------------------------------------------------------------------------------------|----------|-------|-----------------------------|
| Violence Research health<br>care: in Brazil, Bulgaria,<br>Lebanon, Portugal, South<br>Africa, Thailand, Australia<br>(Di Martino, 2009) | 1. Country studies to<br>identify and address workplace<br>violence in the health sector, to<br>develop sound policies and<br>practical approaches for the<br>prevention and elimination of it.                                                            | 2. witness<br>Harm: 6 double barreled<br>items                                    | 1-5: Not at all, to<br>infrequently (a<br>few times in 12<br>months),<br>occasionally (a<br>few times each<br>six months),<br>often (a few<br>times each<br>month),<br>frequently (once<br>or more each<br>week), |          |       | Not<br>identified           |
| <b>Studies digital violence</b><br>Technology facilitated<br>violence (Henry & Powell,<br>2016)                                         | 1. To examine the scope and<br>limitations of criminal laws for<br>responding to technology-<br>facilitated sexual violence<br>(TFSV) e.g., blackmail, control,<br>coerce, harass, humiliate,<br>objectify, or violate another<br>person.<br>2. CE natures | 1. woman in public and<br>private life/ ex<br>partners<br>2. target / perpetrator | Analysis of<br>criminal law<br>responses                                                                                                                                                                          |          |       |                             |
| Cyber violence on Twitter<br>(Nagle, 2018)                                                                                              | 1. A review of the current<br>literature on social media,                                                                                                                                                                                                  | 1. students, teachers<br>2. perpetrator, target                                   | Research on<br>Twitter use in                                                                                                                                                                                     |          |       |                             |

Continued TABLE 1.

| INSTRUMENTS OF NWB<br>CONSTRUCTS (tests,<br>questionnaires, scales)<br>STUDIES                                                                                                                                                                                   | 1. GOAL<br>2. DIGITAL NWB:<br>Cyber enabled (CE) items <sup>1</sup><br>Cyber dependent (CD) items                                                                                                                                                                                                                                                                                                                                                                                  | QUESTIONS ON:<br>1. ACTOR TYPE<br>2. ACTOR ROLE<br>HARM                                                                                                                                                                                                                                                                                                                                                                                                          | RATING SCALE:<br>ANCHORS                                | DURATION | ITEMS | RELIABILITY/<br>CONSISTENCY |
|------------------------------------------------------------------------------------------------------------------------------------------------------------------------------------------------------------------------------------------------------------------|------------------------------------------------------------------------------------------------------------------------------------------------------------------------------------------------------------------------------------------------------------------------------------------------------------------------------------------------------------------------------------------------------------------------------------------------------------------------------------|------------------------------------------------------------------------------------------------------------------------------------------------------------------------------------------------------------------------------------------------------------------------------------------------------------------------------------------------------------------------------------------------------------------------------------------------------------------|---------------------------------------------------------|----------|-------|-----------------------------|
| <p><b>Studies harm</b><br/>The exploding spark:<br/>Workplace violence in an<br/>infectious disease hospital-<br/>longitudinal study<br/>(Magnavita, 2013)</p> <p>Psychosocial work factors<br/>and long sickness absence in<br/>Europe (Slany et al., 2014)</p> | <p>especially Twitter, use in<br/>classrooms, to give a multi-<br/>disciplinary perspective on<br/>issues of cyber-violence and<br/>understand the digital tools we<br/>use in teacher education.<br/>2.CE/CD</p> <p>1.Longitudinal study of<br/>workplace violence on work-<br/>related stress, anxiety, and<br/>depression.</p> <p>1. To investigate workplace<br/>violence (physical violence,<br/>bullying, and discrimination)<br/>relation to long sickness<br/>absence.</p> | <p>1. patients, physicians,<br/>nurses<br/>2. perpetrator, target<br/>Violent Incident<br/>Form (Arnetz, 1998)<br/>combined with Goldberg<br/>scales for anxiety and<br/>depression (Goldberg et al.,<br/>1988), the Demand Control/<br/>Support Questionnaire for<br/>Stress (Karasek, 1979).</p> <p>1. workers<br/>2. target<br/>Over the past 12 months, at<br/>work exposed to: -physical<br/>violence -sexual harassment -<br/>bullying/harassment -age</p> | <p>teacher education<br/>as an educational<br/>tool</p> |          |       |                             |

Continued TABLE 1.

| INSTRUMENTS OF NWB<br>CONSTRUCTS (tests,<br>questionnaires, scales)<br>STUDIES | 1. GOAL<br>2. DIGITAL NWB:<br>Cyber enabled (CE) items <sup>1</sup><br>Cyber dependent (CD) items                                                                                                                            | QUESTIONS ON:<br>1. ACTOR TYPE<br>2. ACTOR ROLE<br>HARM                                                                                                                                                                                                                                                                                                                                                                                                                  | RATING SCALE:<br>ANCHORS                                                             | DURATION                  | ITEMS | RELIABILITY/<br>CONSISTENCY |
|--------------------------------------------------------------------------------|------------------------------------------------------------------------------------------------------------------------------------------------------------------------------------------------------------------------------|--------------------------------------------------------------------------------------------------------------------------------------------------------------------------------------------------------------------------------------------------------------------------------------------------------------------------------------------------------------------------------------------------------------------------------------------------------------------------|--------------------------------------------------------------------------------------|---------------------------|-------|-----------------------------|
| Criminalizing revenge porn<br>(Citron & Franks, 2014)                          | 1.To argue why criminalization<br>of revenge porn is necessary to<br>protect against the devastating<br>invasion of privacy, sexual<br>privacy, especially the non-<br>consensual publication of<br>sexually graphic images. | discrimination linked to race,<br>ethnic background, or color -<br>discrimination linked to<br>nationality -discrimination on<br>the basis of your sex -<br>discrimination linked to<br>religion -discrimination<br>linked to disability -<br>discrimination linked to<br>sexual orientation At least<br>one situation exposure.<br><br>Supporting a narrowly and<br>carefully crafted criminal<br>statute can comport with the<br>First Amendment with<br>several laws. |                                                                                      |                           |       |                             |
| <b>7. ABUSE</b><br>Abusive Supervision Scale<br>(Tepper, 2000)                 | 1. Drawing on justice theory, to<br>examine the consequences of<br>abusive supervisor behavior.                                                                                                                              | 1. subordinate/supervisor<br>2. subordinate as target,<br>supervisor as<br>perpetrator<br>Harm: 0 items                                                                                                                                                                                                                                                                                                                                                                  | 1-5 Can not<br>remember,<br>seldom,<br>sometimes,<br>moderately often,<br>very often | in the past<br>few months | 15    | 0.90                        |

Continued TABLE 1.

| INSTRUMENTS OF NWB<br>CONSTRUCTS (tests,<br>questionnaires, scales)<br>STUDIES                                                                                                                      | 1. GOAL<br>2. DIGITAL NWB:<br>Cyber enabled (CE) items <sup>1</sup><br>Cyber dependent (CD) items                                                                                                                                                                                                                                                                                                                                                                                                                                                                                                      | QUESTIONS ON:<br>1. ACTOR TYPE<br>2. ACTOR ROLE<br>HARM                                                                                         | RATING SCALE:<br>ANCHORS | DURATION | ITEMS | RELIABILITY/<br>CONSISTENCY |
|-----------------------------------------------------------------------------------------------------------------------------------------------------------------------------------------------------|--------------------------------------------------------------------------------------------------------------------------------------------------------------------------------------------------------------------------------------------------------------------------------------------------------------------------------------------------------------------------------------------------------------------------------------------------------------------------------------------------------------------------------------------------------------------------------------------------------|-------------------------------------------------------------------------------------------------------------------------------------------------|--------------------------|----------|-------|-----------------------------|
| <p><b>Studies digital abuse</b><br/>Spyware, unauthorized entry into computers (Stafford &amp; Urbaczewski, 2004).</p> <p>Problematic Internet Use (PIU)(Caplan, 2007)</p> <p><b>Study harm</b></p> | <p>1. indirect infiltration in the form of monitoring programs surreptitiously installed on computers, called spyware, serve to record, and transmit a user's computer uses and behaviors to third parties. Spyware, essentially, is software that asserts control over a user's computer without his/her consent including Adware, Key Loggers, and Trojan Horses.</p> <p>2. CD</p> <p>1. Study examined to which extend social anxiety explains results previously attributed to loneliness as a predictor of preference for online social interaction and problematic Internet use.</p> <p>2.CE</p> | <p>1. hackers and users</p> <p>2. e.g., marketers as perpetrator, customer as target</p> <p>1. Internet users</p> <p>2. target, perpetrator</p> |                          |          |       |                             |

Continued TABLE 1.

| INSTRUMENTS OF NWB<br>CONSTRUCTS (tests,<br>questionnaires, scales)<br>STUDIES                                                                                                                    | 1. GOAL<br>2. DIGITAL NWB:<br>Cyber enabled (CE) items <sup>1</sup><br>Cyber dependent (CD) items                                                                                                                                                           | QUESTIONS ON:<br>1. ACTOR TYPE<br>2. ACTOR ROLE<br>HARM                                                                                                                           | RATING SCALE:<br>ANCHORS                                                                                                                     | DURATION       | ITEMS | RELIABILITY/<br>CONSISTENCY |
|---------------------------------------------------------------------------------------------------------------------------------------------------------------------------------------------------|-------------------------------------------------------------------------------------------------------------------------------------------------------------------------------------------------------------------------------------------------------------|-----------------------------------------------------------------------------------------------------------------------------------------------------------------------------------|----------------------------------------------------------------------------------------------------------------------------------------------|----------------|-------|-----------------------------|
| Abusive supervision and family undermining as displaced aggression (Hoobler & Brass, 2006)                                                                                                        | To investigate the results of abusive supervision on subordinates and their family members.                                                                                                                                                                 | 1. subordinates/ family members<br>2. target                                                                                                                                      |                                                                                                                                              |                |       |                             |
| <b>8. TERROR</b><br>Leymann Inventory of Psychological Terror (LIPT) (Leymann, 1990)                                                                                                              | 1.To develop a questionnaire and typography of 45 mobbing actions, 5 dimensions of effects + items: on self-expression (11), on social contact (5), on personal reputation (15), on occupational situation and quality of life (7), on physical health (7). | 1. coworker<br>2. target<br>Harm: 3 double barreled items                                                                                                                         | 1-7: Completely disagree, to strongly disagree, fairly disagree, neither disagree nor agree, fairly agree, strongly agree, completely agree. | Last one year. | 45    | 0.79                        |
| Cyberstalking (Every-Palmer et al., 2015). Used FTAC* questionnaire of (James et al., 2013), and (Pathé et al., 2014). *Fixated Threat Assessment Centre (FTAC) is a UK police/mental health unit | 1.To investigate the significantly elevated risk of violence, stalking, harassment, and attack to politicians of fixated individuals with untreated serious mental disorders, usually psychosis: in the frequency, nature, and effects. 2. CE               | 1. Politicians as target (and their family and staff)<br>2. A small fraction of people with mental illness as harasser divided in approachers and non-approachers.<br>Harm:1 item | Yes/ No: if affirmative further on nature, frequency: 1,2,3-9,>10, location, duration.<br>+ additional free text replies.                    | Current work   | 42    | Not identified              |
| <b>Study harm</b>                                                                                                                                                                                 |                                                                                                                                                                                                                                                             |                                                                                                                                                                                   |                                                                                                                                              |                |       |                             |

Continued TABLE 1.

| INSTRUMENTS OF NWB<br>CONSTRUCTS (tests,<br>questionnaires, scales)<br>STUDIES                                                                   | 1. GOAL<br>2. DIGITAL NWB:<br>Cyber enabled (CE) items <sup>1</sup><br>Cyber dependent (CD) items                                                                                                                                                                                                                                                                         | QUESTIONS ON:<br>1. ACTOR TYPE<br>2. ACTOR ROLE<br>HARM                                             | RATING SCALE:<br>ANCHORS                  | DURATION     | ITEMS | RELIABILITY/<br>CONSISTENCY |
|--------------------------------------------------------------------------------------------------------------------------------------------------|---------------------------------------------------------------------------------------------------------------------------------------------------------------------------------------------------------------------------------------------------------------------------------------------------------------------------------------------------------------------------|-----------------------------------------------------------------------------------------------------|-------------------------------------------|--------------|-------|-----------------------------|
| Employee safety perception following workplace terrorism: a longitudinal study (Nissen et al., 2019)                                             | 1. To explore longitudinal associations between perceived safety at work among employees exposed to a workplace terrorist attack and their views on security measures and emergency preparedness                                                                                                                                                                          | 1. exposed ministerial employees.<br>2. victim                                                      |                                           |              |       |                             |
| <b>10. INJUSTICE</b><br>Combined effect of perceived organizational injustice and perceived politics on deviant behaviors (Khattak et al., 2021) | 1. To examine the catalytic impact of perceptions of politics in organizations on the relationship between perceived unfairness and deviant behavior at work. Dimensions +items: distributive (4), procedural (6), interactional (4) justice, perceived organizational politics (15), deviant behavior individual (7), deviant behavior organizational (3) expenses (12). | 1. employees<br>2. target-perpetrator-witness role change (Social exchange theory)<br>Harm: 0 items | 1-5: strongly disagree to strongly agree. | Current work | 48    | 0.81                        |
| <b>Studies harm</b><br>Organizational justice: evidence of a new psychosocial predictor of                                                       | 1.To examine the justice of decision-making procedures and interpersonal relations as a                                                                                                                                                                                                                                                                                   | 1. feminine hospital employees<br>2. target                                                         |                                           |              |       |                             |

Continued TABLE 1.

| INSTRUMENTS OF NWB<br>CONSTRUCTS (tests,<br>questionnaires, scales)<br>STUDIES                                                                                                       | 1. GOAL<br>2. DIGITAL NWB:<br>Cyber enabled (CE) items <sup>1</sup><br>Cyber dependent (CD) items                                                                                                                                                   | QUESTIONS ON:<br>1. ACTOR TYPE<br>2. ACTOR ROLE<br>HARM    | RATING SCALE:<br>ANCHORS   | DURATION        | ITEMS | RELIABILITY/<br>CONSISTENCY |
|--------------------------------------------------------------------------------------------------------------------------------------------------------------------------------------|-----------------------------------------------------------------------------------------------------------------------------------------------------------------------------------------------------------------------------------------------------|------------------------------------------------------------|----------------------------|-----------------|-------|-----------------------------|
| health (Elovainio et al.,<br>2002)                                                                                                                                                   | psychosocial predictor of self-<br>rated health, minor psychiatric<br>disorders, and recorded<br>absences due to sickness.                                                                                                                          |                                                            |                            |                 |       |                             |
| Justice at work and reduced<br>risk of coronary heart disease<br>among employees<br>(Kivimäki et al., 2005)                                                                          | 1.To investigate the<br>risk of incident<br>coronary heart disease on<br>employees with an intermediate<br>or low level of justice.                                                                                                                 | 1. British civil servants<br>2. target                     |                            |                 |       |                             |
| <b>11. INTERPERSONAL<br/>CONFLICT</b><br>*Interpersonal Workplace<br>events Scale (Not included in<br>this study the 18 positive<br>behavior Items) (IWES)<br>(Keashly et al., 1994) | Study on abusive interpersonal<br>behaviors (hostile verbal,<br>nonverbal, not physical, sexual<br>contact) directed by one or more<br>persons towards another. 3<br>dimensions: positive (18),<br>abusive (28), physical abusive<br>(2) behaviors. | 1. nurses<br>2. target<br>Harm: 1 double barreled<br>item. | 1-5: Rare to<br>always     | 12 months       | 48    | 0.87-0.92                   |
| Interpersonal Conflict at<br>Work Scale (ICAWS)<br>(Spector & Jex, 1998)                                                                                                             | 1. To assesses the frequency<br>with which employees<br>experience arguments and<br>yelling in their interactions with<br>coworkers.                                                                                                                | 1. workers<br>2. target<br>Harm: 0 items                   | 1-5: Never to<br>every day | Current<br>work | 4     | 0.74                        |



Continued TABLE 1.

| INSTRUMENTS OF NWB<br>CONSTRUCTS (tests,<br>questionnaires, scales)<br>STUDIES                                                                                 | 1. GOAL<br>2. DIGITAL NWB:<br>Cyber enabled (CE) items <sup>1</sup><br>Cyber dependent (CD) items                                                                                                          | QUESTIONS ON:<br>1. ACTOR TYPE<br>2. ACTOR ROLE<br>HARM                                                                                                                                                           | RATING SCALE:<br>ANCHORS                                                                           | DURATION | ITEMS | RELIABILITY/<br>CONSISTENCY |
|----------------------------------------------------------------------------------------------------------------------------------------------------------------|------------------------------------------------------------------------------------------------------------------------------------------------------------------------------------------------------------|-------------------------------------------------------------------------------------------------------------------------------------------------------------------------------------------------------------------|----------------------------------------------------------------------------------------------------|----------|-------|-----------------------------|
| <b>Study digital conflict</b><br>Impact of social media on Millennials – a conceptual study (Kavitha & Bhuvaneswari, 2016)                                     | 1. Explain the pros and cons of the use of social media on personality development personal conflicts and skills of Millennials with the highest internet use since the last few decades.<br>2. CE natures | 1. users of social media<br>2. perpetrators, targets                                                                                                                                                              | Secondary data collected from various journals, articles, blogs, publications, and other websites. |          |       |                             |
| <b>Studies harm</b><br>Workplace conflict resolution and the health of employees in the Swedish and Finnish units of an industrial company (Hyde et al., 2006) | 1. To examine the relationship between conflict management in the workplace and self-reported measures of stress, poor general health, exhaustion, and sickness absence due to overstrain or fatigue.      | 1. non-supervisory employees<br>2. targets<br>The psycho- social work characteristics were measured using the Occupational Stress Questionnaire (OSQ,) (Elo et al., 2003), separate items on conflict management. |                                                                                                    |          |       |                             |
| Conflicts at work are associated with a higher risk of cardiovascular disease (Jacob & Kostev, 2017)                                                           | 1. To analyze the association between workplace conflicts and cardiovascular disorders                                                                                                                     | 1. patients of general practitioners with conflict at work<br>2. target, perpetrator                                                                                                                              |                                                                                                    |          |       |                             |

Continued TABLE 1.

| INSTRUMENTS OF NWB<br>CONSTRUCTS (tests,<br>questionnaires, scales)<br>STUDIES                                        | 1. GOAL<br>2. DIGITAL NWB:<br>Cyber enabled (CE) items <sup>1</sup><br>Cyber dependent (CD) items                                                                                                                                                                  | QUESTIONS ON:<br>1. ACTOR TYPE<br>2. ACTOR ROLE<br>HARM                           | RATING SCALE:<br>ANCHORS                                                                                                             | DURATION                        | ITEMS | RELIABILITY/<br>CONSISTENCY |
|-----------------------------------------------------------------------------------------------------------------------|--------------------------------------------------------------------------------------------------------------------------------------------------------------------------------------------------------------------------------------------------------------------|-----------------------------------------------------------------------------------|--------------------------------------------------------------------------------------------------------------------------------------|---------------------------------|-------|-----------------------------|
|                                                                                                                       | Measure the incidence of<br>angina pectoris, myocardial<br>infarction, and stroke.                                                                                                                                                                                 |                                                                                   |                                                                                                                                      |                                 |       |                             |
| <b>12. VICTIMIZATION/<br/>SCAPEGOATING</b><br>* Perceived Victimization<br>Scale (PVS) ((Aquino &<br>Bradfield, 2000) | 1. Study on situational or<br>dispositional characteristics that<br>are likely to produce self-<br>perceptions of victimization.<br>Dimensions: Verbal (12) and<br>covert (6) hostility,<br>manipulation (5), physical<br>hostility (3), sexual harassment<br>(3). | 1. governmental agency<br>employees<br>2. Victim<br>Harm: 1 double barreled item. | 1-3: Never to<br>more than once                                                                                                      | 12 Months                       | 10    | 0.92                        |
| Juvenile Victimization<br>Questionnaire Interview<br>(JVQ) (Hamby et al., 2004)                                       | 1. Clinical, research, and<br>community settings to help<br>document the true burden of<br>victimization experienced by<br>youth                                                                                                                                   | 1. peer, relative<br>2. victim, witness<br>Harm; 5 interview items                | Either as a one-<br>year incidence<br>rate or as a<br>frequency of<br>number of<br>incidents in the<br>last year –<br>Yes/No or zero | From birth<br>Until 17<br>years | 34    | 0.80                        |
| Cyberstalking victimization<br>(Reyns et al., 2012)                                                                   | 1. study on pursuit behavior by<br>the internet as a time and<br>spaceless nature. It is repeated                                                                                                                                                                  | 1. intimate, friend, ex<br>friend, acquaintance,<br>stranger, coworker,           | *0=Non victim,<br>1=vict1=Intimate,<br>2=Friend/                                                                                     | Ever                            | 13    | Questioned                  |

Continued TABLE 1.

| INSTRUMENTS OF NWB<br>CONSTRUCTS (tests,<br>questionnaires, scales)<br>STUDIES                                                                                                                     | 1. GOAL<br>2. DIGITAL NWB:<br>Cyber enabled (CE) items <sup>1</sup><br>Cyber dependent (CD) items                                                                                                                                                                                                                                                                                                                                                                                                                                                              | QUESTIONS ON:<br>1. ACTOR TYPE<br>2. ACTOR ROLE<br>HARM                                                                                                 | RATING SCALE:<br>ANCHORS                                                                                                                              | DURATION                                     | ITEMS | RELIABILITY/<br>CONSISTENCY   |
|----------------------------------------------------------------------------------------------------------------------------------------------------------------------------------------------------|----------------------------------------------------------------------------------------------------------------------------------------------------------------------------------------------------------------------------------------------------------------------------------------------------------------------------------------------------------------------------------------------------------------------------------------------------------------------------------------------------------------------------------------------------------------|---------------------------------------------------------------------------------------------------------------------------------------------------------|-------------------------------------------------------------------------------------------------------------------------------------------------------|----------------------------------------------|-------|-------------------------------|
|                                                                                                                                                                                                    | behavior: 4 dimensions + items:<br>unwanted contact, (4)<br>harassment, (2) unwanted<br>sexual advances, and (3) threats<br>of violence or physical harm<br>(4).<br>2. CE                                                                                                                                                                                                                                                                                                                                                                                      | customer, neighbor,<br>relative<br>1. target, perpetrator                                                                                               | Acquaintance,<br>3=Stranger<br>*1,2,3,4,5, or<br>more persons<br>*Counting<br>incidents                                                               |                                              |       | digital<br>response<br>rates. |
| <b>13. MICROPOLITICS</b><br>Perceptions of<br>Organizational Politics Scale<br>(POPS) (Kacmar & Carlson,<br>1997)<br><br><b>Study digital politics</b><br>Internet politics (Fung et al.,<br>2013) | Introduction of a new scale that<br>purports to measure perceptions<br>of organizational politics.<br>Dimensions + items: general<br>political behavior (2), go along<br>to go ahead (7), pay and<br>promotion policies (6).<br><br>Bring two opposed perspectives<br>on the influence of digital<br>technologies on politics. Six<br>models: the empowered public<br>sphere, displacement of<br>traditional organizations by new<br>digitally self-organized groups,<br>digitally direct democracy,<br>truth-based advocacy,<br>constituent mobilization, and | 1. coworkers, group<br>2. target, witness<br>Harm: 0 items<br><br>1. citizens, interest<br>groups, organizations,<br>governments<br>2. variety of roles | 1-5: Strongly<br>disagree,<br>disagree, neutral,<br>agree, strongly<br>agree.<br><br>perspectives from<br>scholars of<br>technologies and<br>politics | Context of<br>current<br>work<br>environment | 15    | 0.88                          |

Continued TABLE 1.

| INSTRUMENTS OF NWB<br>CONSTRUCTS (tests,<br>questionnaires, scales)<br>STUDIES   | 1. GOAL<br>2. DIGITAL NWB:<br>Cyber enabled (CE) items <sup>1</sup><br>Cyber dependent (CD) items                                                                                                                                                                                                                                     | QUESTIONS ON:<br>1. ACTOR TYPE<br>2. ACTOR ROLE<br>HARM | RATING SCALE:<br>ANCHORS                                                                       | DURATION  | ITEMS | RELIABILITY/<br>CONSISTENCY |
|----------------------------------------------------------------------------------|---------------------------------------------------------------------------------------------------------------------------------------------------------------------------------------------------------------------------------------------------------------------------------------------------------------------------------------|---------------------------------------------------------|------------------------------------------------------------------------------------------------|-----------|-------|-----------------------------|
|                                                                                  | crowd-sourced social monitoring.                                                                                                                                                                                                                                                                                                      |                                                         |                                                                                                |           |       |                             |
| <b>14. OSTRACISM</b><br>Workplace Ostracism Scale<br>(WOS) (Ferris et al., 2008) | 1. Development of a 10-item<br>measure of workplace<br>ostracism.                                                                                                                                                                                                                                                                     | 1. coworker<br>2. target<br>Harm: 0 items               | 1-7: Never, once<br>in a while,<br>sometimes, fairly<br>often,<br>often, constantly,<br>always | Past year | 10    | 0.75                        |
| <b>Study digital ostracism</b><br>Internet ostracism (Zadro et<br>al., 2004)     | 1. Compares face to face with<br>two digital forms of social<br>exclusion: 1. exclusion of<br>subjects by a computer, 2.<br>selection by computer of people<br>to exclude subjects. Results<br>show a very primitive and<br>automatic adaptive sensitivity in<br>subjects to even the slightest<br>hint of social exclusion.<br>2. CE | 1. subjects<br>2. target                                |                                                                                                |           |       |                             |
| <b>Study harm</b><br>The cost of being ignored:<br>Emotional exhaustion in the   | 1. To investigate how<br>workplace ostracism both spills<br>over and crosses over to                                                                                                                                                                                                                                                  | 1. married partners<br>2. target/ spouse                |                                                                                                |           |       |                             |

Continued TABLE 1.

| INSTRUMENTS OF NWB<br>CONSTRUCTS (tests,<br>questionnaires, scales)<br>STUDIES      | 1. GOAL<br>2. DIGITAL NWB:<br>Cyber enabled (CE) items <sup>1</sup><br>Cyber dependent (CD) items                                         | QUESTIONS ON:<br>1. ACTOR TYPE<br>2. ACTOR ROLE<br>HARM                                                                                                                                                                    | RATING SCALE:<br>ANCHORS                                          | DURATION                                                                                                                              | ITEMS | RELIABILITY/<br>CONSISTENCY                    |
|-------------------------------------------------------------------------------------|-------------------------------------------------------------------------------------------------------------------------------------------|----------------------------------------------------------------------------------------------------------------------------------------------------------------------------------------------------------------------------|-------------------------------------------------------------------|---------------------------------------------------------------------------------------------------------------------------------------|-------|------------------------------------------------|
| work and family domains.<br>(Thompson et al., 2020)                                 | emotional exhaustion for both<br>the ostracism target and his or<br>her spouse.                                                           | Measured with WOS,<br>PANAS (Thompson, 2007),<br>OQ-45.2 (Lambert et al.,<br>1998), MBI ((Maslach et al.,<br>1986), family undermining<br>(Hoobler & Brass, 2006)<br>family emotional exhaustion<br>(Maslach et al., 1986) |                                                                   |                                                                                                                                       |       |                                                |
| <b>15. INCIVILITY</b><br>Workplace Incivility Scale<br>(WIS) (Cortina et al., 2001) | 1.Unidimensional design to<br>assess the frequency of<br>respondent perceptions of<br>disrespectful, rude, or<br>condescending behaviors. | 1. superiors, coworkers<br>2. target<br>Harm: 0 items                                                                                                                                                                      | 1-5: Never, once,<br>or twice,<br>sometimes,<br>often, many times | Previous 5<br>years, also<br>altered to 1<br>year<br>(Cortina &<br>Magley,<br>2009),<br>one month<br>(Matthews<br>& Ritter,<br>2016). | 7     | 0.89                                           |
| Uncivil Workplace Behavior<br>Questionnaire (UWBQ)<br>(Martin & Hine, 2005)         | 1.Propose a broader<br>multidimensional construct than<br>the WIS: 4 dimensions +items:<br>hostility (4), privacy invasion                | 1. managers, colleagues.<br>2. target<br>Harm: 0 items                                                                                                                                                                     | 1-5: Never, once,<br>or twice,<br>sometimes,<br>often, many times | From 5<br>years,<br>altered to 1<br>year                                                                                              | 20    | 0.65 single<br>factor<br>0.91 four<br>factors. |

Continued TABLE 1.

| INSTRUMENTS OF NWB<br>CONSTRUCTS (tests,<br>questionnaires, scales)<br>STUDIES                                                  | 1. GOAL<br>2. DIGITAL NWB:<br>Cyber enabled (CE) items <sup>1</sup><br>Cyber dependent (CD) items                                                                                                                                                                                                | QUESTIONS ON:<br>1. ACTOR TYPE<br>2. ACTOR ROLE<br>HARM                                                                     | RATING SCALE:<br>ANCHORS                                                 | DURATION  | ITEMS | RELIABILITY/<br>CONSISTENCY |
|---------------------------------------------------------------------------------------------------------------------------------|--------------------------------------------------------------------------------------------------------------------------------------------------------------------------------------------------------------------------------------------------------------------------------------------------|-----------------------------------------------------------------------------------------------------------------------------|--------------------------------------------------------------------------|-----------|-------|-----------------------------|
| Cyber incivility<br>(Lim & Teo, 2009)                                                                                           | (5), exclusionary behavior (7),<br>gossiping (4).<br><br>1. Examine cyber incivility by<br>mail in the workplace.<br>Compared workplace incivility<br>(15) with outcomes on job<br>satisfaction, (5) quit intentions<br>(3), organizational commitment<br>(9), workplace deviance (20).<br>2. CE | 1. coworkers<br>2. target, perpetrator as<br>outcome<br>Harm: 0 items                                                       | 1-5: Not at all to<br>all the time.                                      | Past year | 14    | 0.95                        |
| <b>Study digital incivility</b><br>Cyber-incivility                                                                             | 1. Examine within-person<br>relationships between day-level<br>incivility via work e-mail (cyber<br>incivility) and specific<br>employee outcomes of<br>detachment at home and distress<br>spillover from one day to the<br>next.<br>2. CE                                                       | 1. coworkers,<br>supervisors,<br>clients/customers<br>2. target                                                             | Yes / No,<br>Number<br>incidents, and<br>Questionnaire<br>Lim & Teo 2009 |           |       |                             |
| <b>Study harm</b><br>Information and<br>communication technology<br>incivility aggression in the<br>workplace: Implications for | 1. Examine ICT incivility,<br>related to negative mood state,<br>which in turn may have effect                                                                                                                                                                                                   | 1. employees<br>2. target, perpetrator<br>Incivility was measured with<br>the 7 points list of Blau &<br>Anderson, separate |                                                                          |           |       |                             |

Continued TABLE 1.

| INSTRUMENTS OF NWB<br>CONSTRUCTS (tests,<br>questionnaires, scales)<br>STUDIES                                                                                                                                                                                                              | 1. GOAL<br>2. DIGITAL NWB:<br>Cyber enabled (CE) items <sup>1</sup><br>Cyber dependent (CD) items                                                                                                                                                                                                                                                                                                                                                                         | QUESTIONS ON:<br>1. ACTOR TYPE<br>2. ACTOR ROLE<br>HARM                                                                                                                                                                                                                                                                                                                                                                                                                  | RATING SCALE:<br>ANCHORS | DURATION | ITEMS | RELIABILITY/<br>CONSISTENCY |
|---------------------------------------------------------------------------------------------------------------------------------------------------------------------------------------------------------------------------------------------------------------------------------------------|---------------------------------------------------------------------------------------------------------------------------------------------------------------------------------------------------------------------------------------------------------------------------------------------------------------------------------------------------------------------------------------------------------------------------------------------------------------------------|--------------------------------------------------------------------------------------------------------------------------------------------------------------------------------------------------------------------------------------------------------------------------------------------------------------------------------------------------------------------------------------------------------------------------------------------------------------------------|--------------------------|----------|-------|-----------------------------|
| <p>work and family (Zivnuska et al., 2020)</p> <p>Incivility and bullying in the workplace and nurses' shame responses (Felbinger, 2008)</p> <p>How employers &amp; co-workers respond to workplace bullying (Namie, 2008)</p> <p>The cost of bad behavior (Porath &amp; Pearson, 2010)</p> | <p>on attitudes regarding work and family.</p> <p>1. To help the reader of this paper identify disruptive behaviors, describe adverse outcomes of these behaviors, and identify standards that help to create and sustain a healthy work environment.</p> <p>1.Labor Day 2008 Survey: two separate 400-person respondent groups who visited the WBI website.</p> <p>1.To collect data to track the prevalence, types, causes, costs, and cures of incivility at work.</p> | <p>instruments for positive mood, psychological distress, job satisfaction, family satisfaction.</p> <p>1. nurses<br/>2. victim<br/>Local measurement on the network instrument to help identify.</p> <p>1. co-workers, managers<br/>2. target, employer<br/>Survey report on 11 questions.</p> <p>1. managers, workers of 17 industries in US, Canada<br/>2. reacting targets, witness<br/>Report of people's reactions receiving end of incivility in percentages.</p> |                          |          |       |                             |

Continued TABLE 1.

| INSTRUMENTS OF NWB<br>CONSTRUCTS (tests,<br>questionnaires, scales)<br>STUDIES                                                                 | 1. GOAL<br>2. DIGITAL NWB:<br>Cyber enabled (CE) items <sup>1</sup><br>Cyber dependent (CD) items                                                                                                                                                                                                                               | QUESTIONS ON:<br>1. ACTOR TYPE<br>2. ACTOR ROLE<br>HARM                                                                                                                                                          | RATING SCALE:<br>ANCHORS                     | DURATION  | ITEMS | RELIABILITY/<br>CONSISTENCY  |
|------------------------------------------------------------------------------------------------------------------------------------------------|---------------------------------------------------------------------------------------------------------------------------------------------------------------------------------------------------------------------------------------------------------------------------------------------------------------------------------|------------------------------------------------------------------------------------------------------------------------------------------------------------------------------------------------------------------|----------------------------------------------|-----------|-------|------------------------------|
| Employee adiposity and incivility: Establishing a link and identifying demographic moderators and negative consequences. (Sliter et al., 2012) | 1.To explore prevalence of increased adiposity among experienced incivility, burnout and withdrawal on employees in the American workplace                                                                                                                                                                                      | 1. self-selected part time workers<br>2. target<br>Self-reported BMI, WIS and demographic variables.                                                                                                             |                                              |           |       |                              |
| Mental health expenditures: association with workplace incivility and bullying among hospital patient care workers (Sabbath et al., 2018)      | 1.To test associations between bullying and health plan claims for mental health diagnoses.                                                                                                                                                                                                                                     | 1. hospital workers Boston<br>2. target<br>Measurement with NAQ-R, health care utilization, incurred costs.                                                                                                      |                                              |           |       |                              |
| <b>16. SOCIAL SAFETY</b><br>Social Safety Index at work (SVI)(Verschuren, 2012)                                                                | 1. develop a validated and reliable questionnaire on social safety in various industries. 5 Dimensions +items: characteristics: personal & organizational antecedents (37), incidents: natures, severity, actor types & roles (27), coping: individual, organizational, legal, care, correction (41), consequences, individual, | 1. strangers, workers, clients, relatives<br>2. witness, instigator, outsider, collaborator, target, perpetrator<br>Harm: 12 items (organizational), 14 items (individual mental), 7 items (Individual physical) | 1-4: Never/<br>Sometimes/<br>Usually/ Always | Past year | 154   | 0.56<br>0.90<br>0.87<br>0.91 |



Continued TABLE 1.

| INSTRUMENTS OF NWB<br>CONSTRUCTS (tests,<br>questionnaires, scales)<br>STUDIES                                    | 1. GOAL<br>2. DIGITAL NWB:<br>Cyber enabled (CE) items <sup>1</sup><br>Cyber dependent (CD) items                                                                                                                                                                                             | QUESTIONS ON:<br>1. ACTOR TYPE<br>2. ACTOR ROLE<br>HARM                                                                                                                                      | RATING SCALE:<br>ANCHORS                                    | DURATION                                                                                       | ITEMS                            | RELIABILITY/<br>CONSISTENCY |
|-------------------------------------------------------------------------------------------------------------------|-----------------------------------------------------------------------------------------------------------------------------------------------------------------------------------------------------------------------------------------------------------------------------------------------|----------------------------------------------------------------------------------------------------------------------------------------------------------------------------------------------|-------------------------------------------------------------|------------------------------------------------------------------------------------------------|----------------------------------|-----------------------------|
|                                                                                                                   | organizational, material,<br>immaterial (26), policy: rules,<br>measures, communication (23).                                                                                                                                                                                                 |                                                                                                                                                                                              |                                                             |                                                                                                |                                  |                             |
| Monitor of social safety in<br>primary and secondary<br>education (Scholte et al.,<br>2016; Sijbers et al., 2014) | 1. Biennial survey<br>commissioned by the Ministry<br>of Education, Culture and<br>Science in the Netherlands.<br>Dimensions +items: experiences<br>nature violence, feeling of<br>safety, policy, prevention,<br>opportunities for improvement,<br>internal /external care,<br>registration. | 1. pupils, staff,<br>management, parents<br>2. perpetrators, target,<br>avoiders<br>Harm: 0 items                                                                                            | open, yes/no,<br>different rating<br>scales and<br>anchors. | 12 Months                                                                                      | PO<br>108<br>VO<br>187<br>(2016) | Not<br>identified           |
| Building digital safety for<br>journalism. (Henrichsen et<br>al., 2015)                                           | 1.UNESCO research on<br>personal safety, safety of<br>information, safety of people I<br>work with, safety of sources,<br>safety of family, digital security<br>knowledge and training.<br>2. CE: one question<br>CD: on online platforms and<br>tools                                        | 1. online media actors<br>engaged in<br>journalism.<br>in a complex and<br>political climate with<br>sources, colloques,<br>family.<br>2. attacker, target,<br>instigators'<br>Harm: 2 items | Open, yes/no,<br>different rating<br>scales and<br>anchors. | 12-18<br>months<br>Digital use:<br>0-25%, 26-<br>45%, 46-<br>65%, 66-<br>85%, More<br>than 85% | 52                               | Not<br>identified           |
| <b>Study digital social safety</b>                                                                                |                                                                                                                                                                                                                                                                                               |                                                                                                                                                                                              |                                                             |                                                                                                |                                  |                             |

Continued TABLE 1.

| INSTRUMENTS OF NWB<br>CONSTRUCTS (tests,<br>questionnaires, scales)<br>STUDIES | 1. GOAL<br>2. DIGITAL NWB:<br>Cyber enabled (CE) items <sup>1</sup><br>Cyber dependent (CD) items                                                                                                                                    | QUESTIONS ON:<br>1. ACTOR TYPE<br>2. ACTOR ROLE<br>HARM            | RATING SCALE:<br>ANCHORS | DURATION | ITEMS | RELIABILITY/<br>CONSISTENCY |
|--------------------------------------------------------------------------------|--------------------------------------------------------------------------------------------------------------------------------------------------------------------------------------------------------------------------------------|--------------------------------------------------------------------|--------------------------|----------|-------|-----------------------------|
| Cybercrime, Vandalizing the information society (Furnell, 2002)                | This dissertation introduces cyber-dependent crime e.g., like malicious hacking, web defacement, illegal control over IT-systems, malware use. These crimes differ from the cyber-enabled: e.g., online fraud, stalking, harassment. | 1. users of digital tools in modern society<br>2. criminal, target |                          |          |       |                             |

\*Added instruments in the expert round. Note: unnamed instruments indicated with the abbreviations of the author names.

### References

- Aquino, K., & Bradfield, M. (2000). Perceived Victimization in the Workplace: The Role of Situational Factors and Victim Characteristics. *Organization Science*, 11(5), 525–537. <https://doi.org/10.1287/orsc.11.5.525.15205>
- Arenas, A., Giorgi, G., Montani, F., Mancuso, S., Perez, J. F., Mucci, N., & Arcangeli, G. (2015). Workplace bullying in a sample of Italian and Spanish employees and its relationship with job satisfaction, and psychological well-being. *Frontiers in Psychology*, 6(DEC), 1–10. <https://doi.org/10.3389/fpsyg.2015.01912>
- Arnetz, J. E. (1998). The Violent Incident Form (VIF): A practical instrument for the registration of violent incidents in the health care workplace. *Work & Stress*, 12(1), 17–28. <https://doi.org/10.1080/02678379808256846>
- Baran Tatar, Z., & Yuksel, S. (2018). Mobbing at workplace - Psychological trauma and documentation of psychiatric symptoms. *Archives of Neuropsychiatry*, 56(1), 57–62. <https://doi.org/10.29399/npa.22924>
- Baron, R. A., Neuman, J. H., & Geddes, D. (1999). Social and personal determinants of workplace aggression: Evidence for the impact of perceived injustice and the Type A Behavior Pattern. *Aggressive Behavior*, 25(4), 281–296. [https://doi.org/10.1002/\(SICI\)1098-2337\(1999\)25:4<281::AID-AB4>3.0.CO;2-J](https://doi.org/10.1002/(SICI)1098-2337(1999)25:4<281::AID-AB4>3.0.CO;2-J)
- Bennett, R. J., & Robinson, S. L. (2000). Development of a measure of workplace deviance. *Journal of Applied Psychology*, 85(3), 349–360. <https://doi.org/10.1037/0021-9010.85.3.349>

Continued TABLE 1.

| INSTRUMENTS OF NWB<br>CONSTRUCTS (tests,<br>questionnaires, scales)<br>STUDIES | 1. GOAL<br>2. DIGITAL NWB:<br>Cyber enabled (CE) items <sup>1</sup><br>Cyber dependent (CD) items | QUESTIONS ON:<br>1. ACTOR TYPE<br>2. ACTOR ROLE<br>HARM | RATING SCALE:<br>ANCHORS | DURATION | ITEMS | RELIABILITY/<br>CONSISTENCY |
|--------------------------------------------------------------------------------|---------------------------------------------------------------------------------------------------|---------------------------------------------------------|--------------------------|----------|-------|-----------------------------|
|--------------------------------------------------------------------------------|---------------------------------------------------------------------------------------------------|---------------------------------------------------------|--------------------------|----------|-------|-----------------------------|

- Beran, T., & Li, Q. (2005). Cyber-Harassment: A Study of a New Method for an Old Behavior. *Journal of Educational Computing Research*, 32(3), 265–277. <https://doi.org/10.2190/8YQM-B04H-PG4D-BLLH>
- Bjorkqvist, K., Osterman, K., & Hiet-Bdck, M. (1994). Aggression Among University Employees. *Agressive Behaviour*, 20, 173–184. [https://doi.org/10.1002/1098-2337\(1994\)20](https://doi.org/10.1002/1098-2337(1994)20)
- Breiding, M. J., Smith, S. G., Basile, K. C., Walters, M. L., Chen, J., & Merrick, M. T. (2014). Prevalence and characteristics of sexual violence, stalking, and intimate partner violence victimization—national intimate partner and sexual violence survey, United States, 2011. *MMWR Surveill Summ.*, 63(8), 1–18.
- Caplan, S. E. (2007). Relations among loneliness, social anxiety, and problematic internet use. *CyberPsychology & Behavior*, 10(2), 234–242. <https://doi.org/10.1089/cpb.2006.9963>
- Citron, D. K., & Franks, M. A. (2014). Criminalizing revenge porn. *Wake Forest Law Review* 345, 2014. [https://scholarship.law.bu.edu/faculty\\_scholarship/643](https://scholarship.law.bu.edu/faculty_scholarship/643)
- Cortina, L. M., Magley, V. J., Williams, J. H., & Langhout, R. D. (2001). Incivility in the workplace: Incidence and impact. *Journal of Occupational Health Psychology*, 6(1), 64–80. <https://doi.org/10.1037/1076-8998.6.1.64>
- Da Silva João, A. L., & Saldanha Portelada, A. F. (2019). Mobbing and its impact on interpersonal relationships at the workplace. *Journal of Interpersonal Violence*, 34(13), 2797–2812. <https://doi.org/10.1177/0886260516662850>
- Dallner, M., Elo, A., Gamberale, L. F., & Al, E. (2000). *Validation of the General Nordic Questionnaire (QPSNordic) for psychological and social factors at work*. Nordic Council of Ministers.
- Demaray, M. K., Summers, K. H., Jenkins, L. N., & Becker, L. D. (2016). Bullying Participant Behaviors Questionnaire (BPBQ): Establishing a Reliable and Valid Measure. *Journal of School Violence*, 15(2), 158–188. <https://doi.org/10.1080/15388220.2014.964801>
- Di Martino, V. (2009). *Workplace violence in the health sector Country case studies Brazil, Bulgaria, Lebanon, Portugal, South Africa, Thailand and an additional Australian study. Synthesis report*. [https://www.who.int/violence\\_injury\\_prevention/violence/activities/workplace/WVsynthesisreport.pdf](https://www.who.int/violence_injury_prevention/violence/activities/workplace/WVsynthesisreport.pdf)
- Einarsen, S., Hoel, H., & Notelaers, G. (2009). Measuring exposure to bullying and harassment at work: Validity, factor structure and psychometric properties of the Negative Acts Questionnaire-Revised. *Work & Stress*, 23(1), 24–44. <https://doi.org/10.1080/02678370902815673>
- Einarsen, Ståle, Raknes, B. I., Matthiesen, S. B., & Hellestøy, O. H. (1996). Helsemessige aspekter ved mobbing i arbeidslivet: Modererende

Continued TABLE 1.

| INSTRUMENTS OF NWB<br>CONSTRUCTS (tests,<br>questionnaires, scales)<br>STUDIES | 1. GOAL<br>2. DIGITAL NWB:<br>Cyber enabled (CE) items <sup>1</sup><br>Cyber dependent (CD) items | QUESTIONS ON:<br>1. ACTOR TYPE<br>2. ACTOR ROLE<br>HARM | RATING SCALE:<br>ANCHORS | DURATION | ITEMS | RELIABILITY/<br>CONSISTENCY |
|--------------------------------------------------------------------------------|---------------------------------------------------------------------------------------------------|---------------------------------------------------------|--------------------------|----------|-------|-----------------------------|
|--------------------------------------------------------------------------------|---------------------------------------------------------------------------------------------------|---------------------------------------------------------|--------------------------|----------|-------|-----------------------------|

- effekter av sosial støtte og personlighet. *Nordisk Psykologi*, 48(2), 116–137. <https://doi.org/10.1080/00291463.1996.11863874>
- Elo, A.-L., Leppänen, A., & Jahkola, A. (2003). Validity of a single-item measure of stress symptoms. *Scandinavian Journal of Work, Environment & Health*, 29(6), 444–451. <https://doi.org/10.5271/sjweh.752>
- Elovainio, M., Kivimäki, M., & Vahtera, J. (2002). Organizational justice: evidence of a new psychosocial predictor of health. *American Journal of Public Health*, 92, 105–108. <https://ajph.aphapublications.org/doi/pdfplus/10.2105/AJPH.92.1.105>
- Emdad, R., Alipour, A., Hagberg, J., & Jensen, I. B. (2013). The impact of bystanding to workplace bullying on symptoms of depression among women and men in industry in Sweden: an empirical and theoretical longitudinal study. *International Archives of Occupational and Environmental Health*, 86(6), 709–716. <https://doi.org/10.1007/s00420-012-0813-1>
- Escartín, J., Rodríguez-Carballeira, Á., Gómez-Benito, J., & Zapf, D. (2010). Development and validation of the workplace bullying scale EAPA-T. *International Journal of Clinical and Health Psychology*, 10(3), 519–539. <http://www.redalyc.org/articulo.oa?id=33714079008>
- Every-Palmer, S., Barry-Walsh, J., & Pathé, M. (2015). Harassment, stalking, threats and attacks targeting New Zealand politicians: A mental health issue. *Australian & New Zealand Journal of Psychiatry*, 49(7), 634–641. <https://doi.org/10.1177/0004867415583700>
- Farley, S., Coyne, I., Axtell, C., & Sprigg, C. (2016). Design, development and validation of a workplace cyberbullying measure, the WCM. *Work & Stress*, 30(4), 293–317. <https://doi.org/10.1080/02678373.2016.1255998>
- Fawzi, N. (2009). Cyber-mobbing: Ursachen und Auswirkungen von Mobbing im Internet (Cyber-mobbing: Causes and effects of mobbing on the internet). In K. Beck, J. Höflich, K. Kamps, F. Krotz, W. Schweiger, W. Wirth, & Band (Eds.), *Nomos Internet Research* (Band 37). Edition Reinhard Fischer.
- Felblinger, D. M. (2008). Incivility and bullying in the workplace and nurses' shame responses. *Journal of Obstetric, Gynecologic & Neonatal Nursing*, 37(2), 234–242. <https://doi.org/10.1111/j.1552-6909.2008.00227.x>
- Ferris, D. L., Brown, D. J., Berry, J. W., & Lian, H. (2008). The development and validation of the Workplace Ostracism Scale. *Journal of Applied Psychology*, 93(6), 1348–1366. <https://doi.org/10.1037/a0012743>
- Forrest, S., Eatough, V., & Shevlin, M. (2005). Measuring adult indirect aggression: The development and psychometric assessment of the indirect aggression scales. *Aggressive Behavior*, 31(1), 84–97. <https://doi.org/10.1002/ab.20074>
- Fox, S., & Spector, P. E. (2002). *cwb-c-45-english*.
- Fox, S., & Stallworth, L. E. (2005). Racial/ethnic bullying: Exploring links between bullying and racism in the US workplace. *Journal of Vocational Behavior*, 66(3), 438–456. <https://doi.org/10.1016/j.jvb.2004.01.002>

Continued TABLE 1.

| INSTRUMENTS OF NWB<br>CONSTRUCTS (tests,<br>questionnaires, scales)<br>STUDIES | 1. GOAL<br>2. DIGITAL NWB:<br>Cyber enabled (CE) items <sup>1</sup><br>Cyber dependent (CD) items | QUESTIONS ON:<br>1. ACTOR TYPE<br>2. ACTOR ROLE<br>HARM | RATING SCALE:<br>ANCHORS | DURATION | ITEMS | RELIABILITY/<br>CONSISTENCY |
|--------------------------------------------------------------------------------|---------------------------------------------------------------------------------------------------|---------------------------------------------------------|--------------------------|----------|-------|-----------------------------|
|--------------------------------------------------------------------------------|---------------------------------------------------------------------------------------------------|---------------------------------------------------------|--------------------------|----------|-------|-----------------------------|

Fung, A., Russon Gilman, H., & Shkabatur, J. (2013). Six models for the internet + politics. *International Studies Review*, 15(1), 30–47.

<https://doi.org/10.1111/misr.12028>

Furnell, S. (2002). *Cybercrime: Vandalizing the information society*. Addison-Wesley.

Giga, S. I., Hoel, H., & Lewis, D. (2008). *The costs of workplace bullying*.

[https://www.researchgate.net/publication/260246863\\_The\\_Costs\\_of\\_Workplace\\_Bullying](https://www.researchgate.net/publication/260246863_The_Costs_of_Workplace_Bullying)

Gofin, R., & Avitzour, M. (2012). Traditional Versus Internet Bullying in Junior High School Students. *Maternal and Child Health Journal*, 16(8), 1625–1635. <https://doi.org/10.1007/s10995-012-0989-8>

Goldberg, D., Bridges, K., Duncan-Jones, P., & Grayson, D. (1988). Detecting anxiety and depression in general medical settings. *BMJ*, 297(6653), 897–899. <https://doi.org/10.1136/bmj.297.6653.897>

Hamby, S. L., Finkelhor, D., Ormrod, R., Turner, H., Hamby, S. L., Finkelhor, D., Ormrod, R., & Turner, H. (2004). *The Juvenile Victimization Questionnaire (JVQ): Administration and scoring manual* (Number March). Crimes Against Children Research Centre.

Hansen, Å. M., Høgh, A., Garde, A. H., & Persson, R. (2014). Workplace bullying and sleep difficulties: a 2-year follow-up study. *International Archives of Occupational and Environmental Health*, 87(3), 285–294. <https://doi.org/10.1007/s00420-013-0860-2>

Henrichsen, J. R., Betz, M., & Lisosky, J. M. (2015). Building Digital Safety for Journalism: a Survey of Selected Issues. In *Unesco Series on Internet Freedom*. <http://unesdoc.unesco.org/images/0023/002323/232358e.pdf>

Henry, N., & Powell, A. (2016). Sexual violence in the digital age. *Social & Legal Studies*, 25(4), 397–418.

<https://doi.org/10.1177/0964663915624273>

Høgh, A., Hansen, Å. M., Mikkelsen, E. G., & Persson, R. (2012). Exposure to negative acts at work, psychological stress reactions and physiological stress response. *Journal of Psychosomatic Research*, 73(1), 47–52. <https://doi.org/10.1016/j.jpsychores.2012.04.004>

Hoobler, J. M., & Brass, D. J. (2006). Abusive supervision and family undermining as displaced aggression. *Journal of Applied Psychology*, 91(5), 1125–1133. <https://doi.org/10.1037/0021-9010.91.5.1125>

Hubert, A. B., & Furda, J. (1996). *Leidse Mobbing Schaal-II (LEMS-II; geïndividualiseerde versie (Leiden Mobbing Scale-II (LEMS-II individualised version))*. Leiden University.

Hyde, M., Jappinen, P., Theorell, T., & Oxenstierna, G. (2006). Workplace conflict resolution and the health of employees in the Swedish and Finnish units of an industrial company. *Social Science & Medicine*, 63(8), 2218–2227. <https://doi.org/10.1016/j.socscimed.2006.05.002>

Jacob, L., & Kostev, K. (2017). Conflicts at work are associated with a higher risk of cardiovascular disease. *GMS German Medical Science*, 15,

Continued TABLE 1.

| INSTRUMENTS OF NWB<br>CONSTRUCTS (tests,<br>questionnaires, scales)<br>STUDIES | 1. GOAL<br>2. DIGITAL NWB:<br>Cyber enabled (CE) items <sup>1</sup><br>Cyber dependent (CD) items | QUESTIONS ON:<br>1. ACTOR TYPE<br>2. ACTOR ROLE<br>HARM | RATING SCALE:<br>ANCHORS | DURATION | ITEMS | RELIABILITY/<br>CONSISTENCY |
|--------------------------------------------------------------------------------|---------------------------------------------------------------------------------------------------|---------------------------------------------------------|--------------------------|----------|-------|-----------------------------|
|--------------------------------------------------------------------------------|---------------------------------------------------------------------------------------------------|---------------------------------------------------------|--------------------------|----------|-------|-----------------------------|

1–8. <https://doi.org/10.3205/000249>

- James, D. V., Farnham, F. R., & Wilson, S. P. (2013). The fixated threat assessment centre. In J. . Meloy & J. Hoffmann (Eds.), *International Handbook of Threat Assessmen* (pp. 299–320). Oxford University Press. <https://fliphtml5.com/pkir/qlmx>
- Jóhannsdóttir, H. L., & Ólafsson, R. F. (2004). Coping with bullying in the workplace: the effect of gender, age and type of bullying. *British Journal of Guidance & Counselling*, 32(3), 319–333. <https://doi.org/10.1080/03069880410001723549>
- Jönsson, S., Muhonen, T., Forssell, R. C., & Bäckström, M. (2017). Assessing Exposure to Bullying through Digital Devices in Working Life: Two Versions of a Cyberbullying Questionnaire (CBQ). *Psychology*, 08(03), 477–494. <https://doi.org/10.4236/psych.2017.83030>
- Kacmar, K. M., & Carlson, D. S. (1997). Further validation of the perceptions of politics scale (POPS): A multiple sample investigation. *Journal of Management*, 23(5), 627–658. <https://doi.org/10.1177/0013164491511019>
- Karasek, R. A. (1979). Job demands, job decision latitude, and mental strain. Implication for job redesign. *Administrative Science Quarterly*, 24(2), 285–308. <https://www.jstor.org/stable/2392498>
- Kavitha, S., & Bhuvaneswari, R. (2016). Impact of social media on millenials- a conceptual study. *Journal of Management Sciences and Technology*, 4(1), 80–86. <https://www.apeerj.com/ajmsj/journal/docs/issue-oct-2016/ajmst040108.pdf>
- Keashly, L., Trott, V., & MacLean, L. M. (1994). Abusive Behavior In the workplace: a\_prel.pdf. *Violence and Victims*, 9(4), 341–357. [https://d1wqtxts1xzle7.cloudfront.net/53005802/Abusive\\_behavior\\_in\\_the\\_workplace\\_a\\_prel20170505-3112-y427a7-libre.pdf?1493978131=&response-content-disposition=inline%3B+filename%3DAbusive\\_behavior\\_in\\_the\\_workplace\\_a\\_prel.pdf&Expires=1680987381&Signature=D](https://d1wqtxts1xzle7.cloudfront.net/53005802/Abusive_behavior_in_the_workplace_a_prel20170505-3112-y427a7-libre.pdf?1493978131=&response-content-disposition=inline%3B+filename%3DAbusive_behavior_in_the_workplace_a_prel.pdf&Expires=1680987381&Signature=D)
- Khattak, M. N., Zolin, R., & Muhammad, N. (2021). The combined effect of perceived organizational injustice and perceived politics on deviant behaviors. *International Journal of Conflict Management*, 32(1), 62–87. <https://doi.org/10.1108/IJCMA-12-2019-0220>
- Kivimäki, M., Ferrie, J. E., Brunner, E., Head, J., Shipley, M. J., Vahtera, J., & Marmot, M. G. (2005). Justice at Work and Reduced Risk of Coronary Heart Disease Among Employees. *Archives of Internal Medicine*, 165(19), 2245. <https://doi.org/10.1001/archinte.165.19.2245>
- Kivimäki, M., Virtanen, M., Vartiainen, M., Elovainio, M., Vahtera, J., & ..... L. K.-J. (2003). Workplace bullying and the risk of cardiovascular disease and depression. *Occupational & Environmental Medicine*, 60, 779–783. <https://oem.bmj.com/content/60/10/779.short>
- Koenen, K. C., De Vivo, I., Rich-Edwards, J., Smoller, J. W., Wright, R. J., & Purcell, S. M. (2009). Protocol for investigating genetic determinants of posttraumatic stress disorder in women from the Nurses' Health Study II. *BMC Psychiatry*, 9(1), 29.

Continued TABLE 1.

| INSTRUMENTS OF NWB<br>CONSTRUCTS (tests,<br>questionnaires, scales)<br>STUDIES | 1. GOAL<br>2. DIGITAL NWB:<br>Cyber enabled (CE) items <sup>1</sup><br>Cyber dependent (CD) items | QUESTIONS ON:<br>1. ACTOR TYPE<br>2. ACTOR ROLE<br>HARM | RATING SCALE:<br>ANCHORS | DURATION | ITEMS | RELIABILITY/<br>CONSISTENCY |
|--------------------------------------------------------------------------------|---------------------------------------------------------------------------------------------------|---------------------------------------------------------|--------------------------|----------|-------|-----------------------------|
|--------------------------------------------------------------------------------|---------------------------------------------------------------------------------------------------|---------------------------------------------------------|--------------------------|----------|-------|-----------------------------|

<https://doi.org/10.1186/1471-244X-9-29>

- Körükçü, Ö., Bulut, O., Tuzcu, A., Bayram, Z., & Öztürk Türkmen, H. (2014). An adaptation of Leymann Inventory of Psychological Terror to health sciences programs in Turkey. *Anatolian Journal of Psychiatry*, 15(4), 335–343. <https://doi.org/10.5455/apd.42654>
- Lambert, M. J., Finch, A. M., Okiishi, J., Burlingame, G. M., McKelvey, C., & Reisinger, C. W. (. (1998). *Administration and scoring manual for the OQ-10.2: An adult outcome questionnaire for screening individuals and population outcome monitoring*. Stevenson MD: American Professional Credentialing Services. <https://journals.sagepub.com/doi/abs/10.2466/02.08.PR0.112.3.689-693>
- Landers, R. N., & Callan, R. C. (2014). Validation of the beneficial and harmful work-related social media behavioral taxonomies. *Social Science Computer Review*, 32(5), 628–646. <https://doi.org/10.1177/0894439314524891>
- Lee, R. T., & Brotheridge, C. M. (2006). When prey turns predatory: Workplace bullying as a predictor of counteraggression/bullying, coping, and well-being. *European Journal of Work and Organizational Psychology*, 15(3), 352–377. <https://doi.org/10.1080/13594320600636531>
- Leskinen, E. A., & Cortina, L. M. (2014). Dimensions of disrespect: Mapping and measuring gender harassment in organizations. *Psychology of Women Quarterly*, 38(1), 107–123. <https://doi.org/10.1177/0361684313496549>
- Leymann, H. (1990). Mobbing and psychological terror at workplaces. *Violence and Victims*, 5, 119–126. [https://www.mobbingportal.com/LeymannV&V1990\(3\).pdf](https://www.mobbingportal.com/LeymannV&V1990(3).pdf)
- Leymann, H. (1996). The content and development of mobbing at work. *European Journal of Work and Organizational Psychology*, 5(2), 165–184. <https://doi.org/10.1080/13594329608414853>
- Lim, V. K. (2002). The IT way of loafing on the job: cyberloafing, neutralizing and organizational justice. *Journal of Organizational Behavior*, 23(5), 675–694. <https://doi.org/10.1002/job.161>
- Magnavita, N. (2013). The exploding spark: Workplace violence in an infectious disease hospital- longitudinal study. *BioMed Research International*, 1–9. <https://doi.org/10.1155/2013/316358>
- Martin, R. J., & Hine, D. W. (2005). Development and validation of the Uncivil Workplace Behavior Questionnaire. *Journal of Occupational Health Psychology*, 10(4), 477–490. <https://doi.org/10.1037/1076-8998.10.4.477>
- Maslach, C., Jackson, S. E., & Head, M. P. (1986). *Maslach Burnout Inventory*. Consulting Psychologists Press.
- Maslach, C., Jackson, S. E., & Leiter, M. P. (1997). Maslach Burnout Inventory: In C. P. Zalaquett & R. J. Wood (Eds.), *Evaluating stress: A book of resources* (3rd ed., pp. 191–218). Scarecrow Education.
- Nagle, J. (2018). Twitter, cyber-violence, and the need for a critical social media literacy in teacher education: A review of the literature.

Continued TABLE 1.

| INSTRUMENTS OF NWB<br>CONSTRUCTS (tests,<br>questionnaires, scales)<br>STUDIES | 1. GOAL<br>2. DIGITAL NWB:<br>Cyber enabled (CE) items <sup>1</sup><br>Cyber dependent (CD) items | QUESTIONS ON:<br>1. ACTOR TYPE<br>2. ACTOR ROLE<br>HARM | RATING SCALE:<br>ANCHORS | DURATION | ITEMS | RELIABILITY/<br>CONSISTENCY |
|--------------------------------------------------------------------------------|---------------------------------------------------------------------------------------------------|---------------------------------------------------------|--------------------------|----------|-------|-----------------------------|
|--------------------------------------------------------------------------------|---------------------------------------------------------------------------------------------------|---------------------------------------------------------|--------------------------|----------|-------|-----------------------------|

- Teaching and Teacher Education*, 76(September), 86–94. <https://doi.org/10.1016/j.tate.2018.08.014>
- Namie, G. (2008). *How employers pay for bullying*. <http://bullyinginstitute.org/education/bbstudies/econ.html>
- Neese, W. T., Ferrell, L., & Ferrell, O. C. (2005). An analysis of federal mail and wire fraud cases related to marketing. *Journal of Business Research*, 58(7), 910–918. <https://doi.org/10.1016/j.jbusres.2004.01.010>
- Nielsen, M. ., Emberland, J. S., & Knardahl, S. (2017). Workplace bullying as a predictor of disability retirement. *Journal of Occupational and Environmental Medicine*, 59(7), 609–614. <https://doi.org/10.1097/JOM.0000000000001026>
- Nissen, A., Hansen, M. B., Nielsen, M. ., Knardahl, S., & Heir, T. (2019). Employee safety perception following workplace terrorism: a longitudinal study. *European Journal of Psychotraumatology*, 10(1), 1478584. <https://doi.org/10.1080/20008198.2018.1478584>
- Patchin, J. W., & Hinduja, S. (2015). Measuring cyberbullying: Implications for research. *Aggression and Violent Behavior*, 23, 69–74. <https://doi.org/10.1016/j.avb.2015.05.013>
- Pathé, M., Phillips, J., Perdacher, E., & Heffernan, E. (2014). The Harassment of Queensland Members of Parliament: A Mental Health Concern. *Psychiatry, Psychology and Law*, 21(4), 577–584. <https://doi.org/10.1080/13218719.2013.858388>
- Porath, C. L., & Pearson, C. M. (2010). The cost of bad behavior. *Organizational Dynamics*, 39(1), 64–71. <https://doi.org/10.1016/j.orgdyn.2009.10.006>
- Privitera, C., & Campbell, M. . (2009). Cyberbullying: The new face of workplace bullying? *Cyber Psychology and Behavior*, 12, 395–400. <https://doi.org/10.1089/cpb.2009.0025> PDF/EPUB
- Reyns, B. W., Henson, B., & Fisher, B. S. (2012). Stalking in the twilight zone: Extent of cyberstalking victimization and offending among college students. *Deviant Behavior*, 33(1), 1–25. <https://doi.org/10.1080/01639625.2010.538364>
- Rivera, J., & Abúin, M. (2003). Cuestionario de estrategias de acoso en el trabajo: El LIPT-60 (Leymann Inventory of Psychological Terrorization) en version espa- ñola [Questionnaire of etrategies of harrassment at the workplace: El LIPT-60 (Leymann Inventory of Psychological Terrorizatio. *Psiquis*, 24(2), 59–69. [https://www.academia.edu/33980625/Cuestionario\\_de\\_estrategias\\_de\\_acoso\\_psicologico\\_Leymann\\_Inventory\\_of\\_Psychological\\_Terrorization](https://www.academia.edu/33980625/Cuestionario_de_estrategias_de_acoso_psicologico_Leymann_Inventory_of_Psychological_Terrorization)
- Rospenda, K. M., & Richman, J. A. (2004). The factor structure of generalized workplace harassment. *Violence and Victims*, 19(2), 221–238. <https://doi.org/10.1891/088667004780927963>
- Ruiz-Hernández, J. A., López-García, C., Llor-Esteban, B., Galián-Muñoz, I., & Benavente-Reche, A. P. (2016). Evaluation of the users violence



Continued TABLE 1.

| INSTRUMENTS OF NWB<br>CONSTRUCTS (tests,<br>questionnaires, scales)<br>STUDIES | 1. GOAL<br>2. DIGITAL NWB:<br>Cyber enabled (CE) items <sup>1</sup><br>Cyber dependent (CD) items | QUESTIONS ON:<br>1. ACTOR TYPE<br>2. ACTOR ROLE<br>HARM | RATING SCALE:<br>ANCHORS | DURATION | ITEMS | RELIABILITY/<br>CONSISTENCY |
|--------------------------------------------------------------------------------|---------------------------------------------------------------------------------------------------|---------------------------------------------------------|--------------------------|----------|-------|-----------------------------|
|--------------------------------------------------------------------------------|---------------------------------------------------------------------------------------------------|---------------------------------------------------------|--------------------------|----------|-------|-----------------------------|

in primary health care: Adaptation of an instrument. *International Journal of Clinical and Health Psychology*, 16(3), 295–305.

<https://doi.org/10.1016/j.ijchp.2016.06.001>

Sabbath, E. L., Williams, J. A. R., Boden, L. I., Tempesti, T., Wagner, G. R., Hopcia, K., Hashimoto, D., & Sorensen, G. (2018). Mental health expenditures: Association with workplace incivility and bullying among hospital patient care workers. *Journal of Occupational and Environmental Medicine*, 60(8), 737–742. <https://doi.org/10.1097/JOM.0000000000001322>

Savicki, V., Cooley, E., & Gjesvold, J. (2003). Harassment as a Predictor of Job Burnout in Correctional Officers. *Criminal Justice and Behavior*, 30(5), 602–619. <https://doi.org/10.1177/0093854803254494>

Schneider, K. T., Hitlan, R. T., & Radhakrishnan, P. (2000). An examination of the nature and correlates of ethnic harassment experiences in multiple contexts. *Journal of Applied Psychology*, 85(1), 3–12. <https://doi.org/10.1037/0021-9010.85.1.3>

Scholte, R., Nelen, W., De Wit, W., & Kroes, G. (2016). *Sociale veiligheid in en rond scholen [Social safety in and around schools] 2010-2016* (Number december). <https://www.rijksoverheid.nl/documenten/rapporten/2016/12/23/sociale-veiligheid-in-en-rond-scholen>

Shimomitsu, T., Haratani, T., Iwata, N., & Nakamura, K. (2000). The Final Development of the Brief Job Stress Questionnaire Mainly Used for Assessment of the Individuals. In M. Kato (Ed.), *A Research Report Relating to Stress in the Workplace and its Impact on Workers' Health* (ored Grant, pp. 126–164). Ministry of Labour.

Sijbers, R., De Wit, W., Fettelaar, D., & Mooij, T. (2014). *Sociale veiligheid in en rond scholen. Primair (speciaal) onderwijs 2010-2014; Voortgezet (speciaal) onderwijs 2006-2014. [Social safety in and around schools. Primary (special) education 2010-2014; Secondary (special) education 2006-2014]*. <https://www.researchgate.net/publication/285926152%0ASijbers>,

Slany, C., Schütte, S., Chastang, J.-F., Parent-Thirion, A., Vermeulen, G., & Niedhammer, I. (2014). Psychosocial work factors and long sickness absence in Europe. *International Journal of Occupational and Environmental Health*, 20(1), 16–25. <https://doi.org/10.1179/2049396713Y.00000000048>

Sliter, K. A., Sliter, M. T., Withrow, S. A., & Jex, S. M. (2012). Employee adiposity and incivility: Establishing a link and identifying demographic moderators and negative consequences. *Journal of Occupational Health Psychology*, 17(4), 409–424. <https://doi.org/10.1037/a0029862>

Smoktunowicz, E., Baka, L., Cieslak, R., Nichols, C. F., Benight, C. C., & Luszczynska, A. (2015). Explaining counterproductive work behaviors among police officers: The indirect effects of job demands are mediated by job burnout and moderated by job control and social support. *Human Performance*, 28(4), 332–350. <https://doi.org/10.1080/08959285.2015.1021045>

Continued TABLE 1.

| INSTRUMENTS OF NWB<br>CONSTRUCTS (tests,<br>questionnaires, scales)<br>STUDIES | 1. GOAL<br>2. DIGITAL NWB:<br>Cyber enabled (CE) items <sup>1</sup><br>Cyber dependent (CD) items | QUESTIONS ON:<br>1. ACTOR TYPE<br>2. ACTOR ROLE<br>HARM | RATING SCALE:<br>ANCHORS | DURATION | ITEMS | RELIABILITY/<br>CONSISTENCY |
|--------------------------------------------------------------------------------|---------------------------------------------------------------------------------------------------|---------------------------------------------------------|--------------------------|----------|-------|-----------------------------|
|--------------------------------------------------------------------------------|---------------------------------------------------------------------------------------------------|---------------------------------------------------------|--------------------------|----------|-------|-----------------------------|

- Spector, P. E., & Jex, S. M. (1998). Development of four self-report measures of job stressors and strain: Interpersonal conflict at work scale, organizational constraints scale, quantitative workload inventory, and physical symptoms inventory. *Journal of Occupational Health Psychology*, 3(4), 356–367. <https://psycnet.apa.org/buy/1998-12418-005>
- Stafford, T. F., & Urbaczewski, A. (2004). Spyware: The ghost in the machine. *Communications of the Association for Information Systems*, 14, 291–306. [http://130.18.86.27/faculty/warkentin/SecurityPapers/Merrill/StaffordUrbaczewski2004\\_CAIS14\\_Spyware.pdf](http://130.18.86.27/faculty/warkentin/SecurityPapers/Merrill/StaffordUrbaczewski2004_CAIS14_Spyware.pdf)
- Takaki, J., Taniguchi, T., & Hirokawa, K. (2013). Associations of workplace bullying and harassment with pain. *International Journal of Environmental Research and Public Health*, 10(10), 4560–4570. <https://doi.org/10.3390/ijerph10104560>
- Tepper, B. J. (2000). Consequences of Abusive Supervision. *Academy of Management Journal*, 43(2), 178–190. <https://doi.org/10.5465/1556375>
- Thompson, E. R. (2007). Development and Validation of an Internationally Reliable Short-Form of the Positive and Negative Affect Schedule (PANAS). *Journal of Cross-Cultural Psychology*, 38(2), 227–242. <https://doi.org/10.1177/0022022106297301>
- Thompson, M. J., Carlson, D. S., Kacmar, K. M., & Vogel, R. M. (2020). The cost of being ignored: Emotional exhaustion in the work and family domains. *Journal of Applied Psychology*, 105(2), 186–195. <https://doi.org/10.1037/apl0000433>
- Thurston, R. C., Chang, Y., Matthews, K. A., von Känel, R., & Koenen, K. (2019). Association of sexual harassment and sexual assault with midlife women’s mental and physical health. *JAMA Internal Medicine*, 179(1), 48. <https://doi.org/10.1001/jamainternmed.2018.4886>
- Tremblay, A. C. (2004). E-mails nail wrongdoers. *National Underwriter, P&C*, 108(41), 5. <https://doi.org/10.1002/imhj.20015>
- Verkuil, B., Atasayi, S., & Molendijk, M. L. (2015). Workplace bullying and mental health : A meta- analysis on cross-sectional and longitudinal data. *PLoS ONE*, 10(8), 1–17. <https://doi.org/10.1371/journal.pone0135225>
- Verschuren, C. M. (2012). *Handleiding Sociale veiligheidsindex: Sociale veiligheid binnen de werkomgeving (Manual Social Safetyindex: Social safety in the working environment )* (2nd ed.). Kerckebosch. <https://www.kerckebosch.nl/arbo-veiligheid/handleiding-sociale-veiligheidsindex-2832>
- Vranjes, I., Baillien, E., Vandebosch, H., Erreygers, S., & De Witte, H. (2018). When workplace bullying goes online: construction and validation of the Inventory of Cyberbullying Acts at Work (ICA-W). *European Journal of Work and Organizational Psychology*, 27(1), 28–39. <https://doi.org/10.1080/1359432X.2017.1363185>
- Waschgler, K., Ruiz-Hernández, J. A., Llor-Esteban, B., & Jiménez-Barbero, J. A. (2013). Vertical and Lateral Workplace Bullying in Nursing. *Journal of Interpersonal Violence*, 28(12), 2389–2412. <https://doi.org/10.1177/0886260513479027>
- Weatherbee, T. G. (2007). Cyberaggression in the workplace: Construct development, operationalization, and measurement (Dissertation at Saint

Continued TABLE 1.

| INSTRUMENTS OF NWB<br>CONSTRUCTS (tests,<br>questionnaires, scales)<br>STUDIES | 1. GOAL<br>2. DIGITAL NWB:<br>Cyber enabled (CE) items <sup>1</sup><br>Cyber dependent (CD) items | QUESTIONS ON:<br>1. ACTOR TYPE<br>2. ACTOR ROLE<br>HARM | RATING SCALE:<br>ANCHORS | DURATION | ITEMS | RELIABILITY/<br>CONSISTENCY |
|--------------------------------------------------------------------------------|---------------------------------------------------------------------------------------------------|---------------------------------------------------------|--------------------------|----------|-------|-----------------------------|
|--------------------------------------------------------------------------------|---------------------------------------------------------------------------------------------------|---------------------------------------------------------|--------------------------|----------|-------|-----------------------------|

Mary's University, Halifax). In *ProQuest Dissertations and Theses*.

[https://search.proquest.com/docview/304719031?accountid=14504%0Ahttp://godot.lib.sfu.ca/GODOT/hold\\_tab.cgi?url\\_ver=Z39.88-2004&rft\\_val\\_fmt=info:ofi/fmt:kev:mtx:dissertation&genre=dissertations+%26+theses&sid=ProQ:ProQuest+Dissertations+%26+Theses+A%26I&at](https://search.proquest.com/docview/304719031?accountid=14504%0Ahttp://godot.lib.sfu.ca/GODOT/hold_tab.cgi?url_ver=Z39.88-2004&rft_val_fmt=info:ofi/fmt:kev:mtx:dissertation&genre=dissertations+%26+theses&sid=ProQ:ProQuest+Dissertations+%26+Theses+A%26I&at)

Weatherbee, T. G., & Kelloway, E. (2006). A case of cyberdeviancy: Cyberaggression in the workplace. In K. E. Kelloway, J. Barling, & J. . Hurrell (Eds.), *Handbook of Workplace Violence* (pp. 445–488). SAGE Publications, Inc. <https://doi.org/10.4135/9781412976947.n19>

Weiss, D., & Marmar, C. (1997). The Impact of Event Scale — Revised. In J. Wilson & T. Keane (Eds.), *Assessing psychological trauma and PTSD* (pp. 399–411). Guildford.

West, S. M., Crawford, K., & Whittaker, M. (2019). *Discriminating systems: Gender, race, and power in AI*.

<https://ainowinstitute.org/discriminatingystems.pdf>

Xu, T., Magnusson Hanson, L. L., Lange, T., Starkopf, L., Westerlund, H., Madsen, I. E. H., Rugulies, R., Pentti, J., Stenholm, S., Vahtera, J., Hansen, Å. M., Kivimäki, M., & Rod, N. H. (2018). Workplace bullying and violence as risk factors for type 2 diabetes: a multicohort study and meta-analysis. *Diabetologia*, 61(1), 75–83. <https://doi.org/10.1007/s00125-017-4480-3>

Zadro, L., Williams, K. D., & Richardson, R. (2004). How low can you go? Ostracism by a computer is sufficient to lower self-reported levels of belonging, control, self-esteem, and meaningful existence. *Journal of Experimental Social Psychology*, 40(4), 560–567. <https://doi.org/10.1016/j.jesp.2003.11.006>

Zivnuska, S. L., Carlson, D. S., Carlson, J. R., Harris, K. J., Harris, R. B., & Valle, M. (2020). Information and communication technology incivility aggression in the workplace: Implications for work and family. *Information Processing & Management*, 57(3), 102222. <https://doi.org/10.1016/j.ipm.2020.102222>
