# Supplementary material for: Beyond Bullying, Aggression, Discrimination, Social Safety: Development of an Integrated Negative Work Behavior Questionnaire (INWBQ)
Source: Preprints.org preprint supplement (doi:10.20944/preprints202305.1852.v1), 2023-05-26
Supplement: Supplementary file 1 [file supplementary]

## Sheet: Blad1
TABLE 4		Dimension Mental harm		16 mental harms (53 before reduction)				ranking for
Construct	instrument					items	reduced	item selection
		Temporarily mental complaints		double barreled and multiple choice items separately included in red
				Feeling anxious based on		14	1	1
Aggression	cyber aggression	Mental harm	Temporarily Mental complaints	Q6 After receiving a negative email, how often did you feel....anxious
Aggression	cyber aggression	Mental harm	Temporarily Mental complaints	Q6 After receiving a negative email, how often did you feel....frightened
Aggression	cyber aggression	Mental harm	Temporarily Mental complaints	Q11. did you feel scared
Aggression	cyber aggression	Mental harm	Temporarily Mental complaints	Q11. did you feel afraid
Violence	Violence research	Mental harm	Temporarily Mental complaints	6.resulting in fear of physical harm
Violence	Violence research	Mental harm	Temporarily Mental complaints	6.resulting in fear of sexual harm
Violence	Violence research	Mental harm	Temporarily Mental complaints	6.resulting in fear of psychological harm
Violence	Violence research	Mental harm	Temporarily Mental complaints	6.resulting in fear of other negative consequences to the targeted individuals or groups.
Harassment/discrimination	Cyber harassment	Mental harm	Temporarily Mental complaints	﻿4. If yes, how have you been impacted? (Circle one) 0 I felt afraid
Harassment/discrimination	Cyber harassment	Mental harm	Temporarily Mental complaints	4. If yes, how have you been impacted? (Circle one) 0 I felt anxious
Victimization/ scapegoating	JVQ	Mental harm	Temporarily Mental complaints	M2 did you get scared or feel really bad because grown-ups in your life called you names,
Aggression	FSS	Mental harm	Temporarily Mental complaints	Dreaded (felt anxious) going in to work
Violence	Violence research	Mental harm	Temporarily Mental complaints	4. that person to feel threatened,
Interpersonal conflict	IWES	Mental harm	Temporarily Mental complaints	17. Frightened by someone's behavior towards me
Social safety	SVI	Mental harm	Temporarily Mental complaints	56. Feeling unsafe at work		1	1	7
				Feeling angry based on		6	1	3
Aggression	cyber aggression	Mental harm	Temporarily Mental complaints	﻿ Q6 After receiving a negative email, how often did you feel....furious
Aggression	cyber aggression	Mental harm	Temporarily Mental complaints	Q6 After receiving a negative email, how often did you feel....angry
Social safety	SVI	Mental harm	Temporarily Mental complaints	115. I get irritated easily
Aggression	cyber aggression	Mental harm	Temporarily Mental complaints	Q11. did you feel hostile
Harassment/discrimination	Cyber harassment	Mental harm	Temporarily Mental complaints	4. If yes, how have you been impacted? (Circle one) 0 I felt angry
Aggression	cyber aggression	Mental harm	Temporarily Mental complaints	Q11. did you feel irritable
				Feeling stressed based on		6	1	3
Aggression	cyber aggression	Mental harm	Temporarily mental complaints	Q7. ﻿have you ..felt under strain?
Aggression	cyber aggression	Mental harm	Temporarily Mental complaints	Q11. did you feel ..distressed
Aggression	cyber aggression	Mental harm	Temporarily Mental complaints	Q11. did you feel upset
Aggression	cyber aggression	Mental harm	Temporarily Mental complaints	Q11. did you feel nervous
Aggression	cyber aggression	Mental harm	Temporarily Mental complaints	Q11. did you feel jittery
Aggression	FSS	Mental harm	Temporarily Mental complaints	Felt stressed out
				Feeling ashamed based on		9	1	2
Violence	Violence research	Mental harm	Temporarily Mental complaints	4. that person to feel embarrassed
Bullying	WCM	Mental harm	Temporarily Mental complaints	5. Had another organisational member copy people into messages that embarrass you
Harassment/discrimination	Cyber harassment	Mental harm	Temporarily Mental complaints	4. If yes, how have you been impacted? (Circle one) 0I felt embarrassed
Harassment/discrimination	Generalized Workpl. Harassment	Mental harm	Temporarily Mental complaints	22. Left notes, signs or other materials,which were meant to embarrass you?
Aggression	cyber aggression	Mental harm	Temporarily Mental complaints	Q11. did you feel ashamed
Harassment/discrimination	Cyber harassment	Mental harm	Temporarily Mental complaints	4. If yes, how have you been impacted? (Circle one) 0I blame myself
Aggression	cyber aggression	Mental harm	Temporarily Mental complaints	Q11. did you feel guilty
Aggression	FSS	Mental harm	Temporarily Mental complaints	Experienced feelings of shame or guilt
Aggression	IAS-T	Mental harm	Temporarily Mental complaints	4. Tried to influence them by making them feel guilty
				Effecting my social comunication based on		4	1	5
Terror	LIPT	Mental harm	Temporarily Mental complaints	F1. Effects on self-expression and communication
Terror	LIPT	Mental harm	Temporarily Mental complaints	F1. Effects on self-expression and communication
Social safety	SVI	Mental harm	Temporarily Mental complaints	123. My relationship with colleagues has deteriorated since the unpleasant event
Terror	LIPT	Mental harm	Temporarily Mental complaints	F2. Effects on social contacts
Aggression	cyber aggression	Mental harm	Temporarily Mental complaints	Q6 After receiving a negative email, how often did you feel....disgusted		1	1	7
Aggression	cyber aggression	Mental harm	Temporarily Mental complaints	Q6 After receiving a negative email, how often did you feel....fatiqued		1	1	7
Aggression	cyber aggression	Mental harm	Temporarily Mental complaints	Q6 After receiving a negative email, how often did you feel....bored		1	1	7
				Lost of interest based on		2	1	6
Social safety	SVI	Mental harm	Temporarily Mental complaints	120. I feel that the future no longer matters
Social safety	SVI	Mental harm	Temporarily Mental complaints	118. I have less interest in things (private, hobbies, work)
				Concentration problems based on		3	1	4
Harassment/discrimination	Cyber harassment	Mental harm	Temporarily Mental complaints	4. If yes, how have you been impacted? (Circle one) 0 I had difficulties concentrating
Aggression	cyber aggression	Mental harm	Temporarily mental complaints	Q7. ﻿have you ...been able to concentrate on whatever you’re doing?
Social safety	SVI	Mental harm	Temporarily Mental complaints	121. I have difficulty remembering things because of an unpleasant event at work
Social safety	SVI	Mental harm	Temporarily Mental complaints	117. Lately I am behaving differently than colleagues are used to from me		1	1	7
Social safety	SVI	Mental harm	Temporarily Mental complaints	119. I feel emotionally dull		1	1	7
Social safety	SVI	Mental harm	Temporarily Mental complaints	122. I make more mistakes since an unpleasant event at work		1	1	7
Violence	Violence research	Mental harm	Temporarily Mental complaints	4. that person to feel humiliated, or		1	1	7
Aggression	cyber aggression	Mental harm	Temporarily Mental complaints	﻿Q8. Have you ..had nightmares or disturbing dreams?		1	1	7
					TOTAL	53	16
