# Supplementary material for: Beyond Bullying, Aggression, Discrimination, Social Safety: Development of an Integrated Negative Work Behavior Questionnaire (INWBQ)
Source: Preprints.org preprint supplement (doi:10.20944/preprints202305.1852.v1), 2023-05-26
Supplement: Supplementary file 3 [file supplementary]

**TABLE 2**

| <b>Dimensions:</b>        | 1                    | 2               | 3                     | 4              | 5        | 6       |
|---------------------------|----------------------|-----------------|-----------------------|----------------|----------|---------|
| <b>NWB</b>                | Physical             | Material        | Psychological         | Socio-cultural | Digital  | -       |
| <b>Harm</b>               | Bodily               | Material Damage | Mental                | Social         | -        | -       |
| <b>Actor types</b>        | Stranger             | Worker          | Costumer/client/pupil | Relative       | -        | -       |
| <b>Actor roles</b>        | Perpetrator          | Target          | Assistant             | Defender       | Outsider | Witness |
| <b>Occurrence Pattern</b> | Systematic frequency | Duration        | Escalation            | Visibility     | -        | -       |

**TABLE 2.** Dimensions INWBQ
