# Supplementary material for: Beyond Bullying, Aggression, Discrimination, Social Safety: Development of an Integrated Negative Work Behavior Questionnaire (INWBQ)
Source: Preprints.org preprint supplement (doi:10.20944/preprints202305.1852.v1), 2023-05-26
Supplement: Supplementary file 5 [file supplementary]

**TABLE 5.**

| <b>Dimension Actor types, Subcategories, Types</b>                                                                                                                                                                                                                                                                                                                                                                                                                                                                                                                                                                                                                                                                                                                                                                                                                                                                                                                                                                                                                                                                                                                                                                             | <b>Dimension Actor roles, Subcategories, Roles</b>                                                                                                                                                                                                                                                                                                                                                                                                                                                                                                                                                                                                                                                                                                                                                                                                                                                                                                                                                                      |
|--------------------------------------------------------------------------------------------------------------------------------------------------------------------------------------------------------------------------------------------------------------------------------------------------------------------------------------------------------------------------------------------------------------------------------------------------------------------------------------------------------------------------------------------------------------------------------------------------------------------------------------------------------------------------------------------------------------------------------------------------------------------------------------------------------------------------------------------------------------------------------------------------------------------------------------------------------------------------------------------------------------------------------------------------------------------------------------------------------------------------------------------------------------------------------------------------------------------------------|-------------------------------------------------------------------------------------------------------------------------------------------------------------------------------------------------------------------------------------------------------------------------------------------------------------------------------------------------------------------------------------------------------------------------------------------------------------------------------------------------------------------------------------------------------------------------------------------------------------------------------------------------------------------------------------------------------------------------------------------------------------------------------------------------------------------------------------------------------------------------------------------------------------------------------------------------------------------------------------------------------------------------|
| <p><b>Subcategories stranger</b></p> <ul style="list-style-type: none"> <li>Public, visitors, and users of social media (based on e.g., deviance scale, UWBQ, HABS-U, digital safety)</li> </ul> <p><b>Subcategory coworker/ manager</b></p> <ul style="list-style-type: none"> <li>Co-worker (based on e.g., HABS-CS, cyber aggression, NAQ-R, WCM, CBQ, CBQ-S, ICA-W, LEMS-II, SEQ, EHE, CWB-C, POPS, LIPT, WIS, WOS, UWBQ)</li> <li>Professional e.g., teacher, politician, marketer, journalist, health care worker (based on e.g., HABS-CS, cyberstalking victimization)</li> <li>Manager (based on e.g., UWBQ, WIS, Abusive supervision scale)</li> </ul> <p><b>Subcategory client/customer/pupil,</b></p> <ul style="list-style-type: none"> <li>Client, customer, students, supplier (based on e.g., cyber incivility, monitor social safety)</li> </ul> <p><b>Subcategory relative,</b></p> <ul style="list-style-type: none"> <li>Family, acquaintance, (ex) friend, intimate, source (based on e.g., HABS-U, JVQ)</li> </ul> <p><b>Subcategory actor group</b></p> <ul style="list-style-type: none"> <li>Citizens, shared interest group, organizational group (based on e.g., violence research, POPS)</li> </ul> | <p><b>Subcategory role perpetrator</b></p> <ul style="list-style-type: none"> <li>Bully, attacker (based e.g., HABS-CS, CWB-C, POPS)</li> </ul> <p><b>Subcategory role target</b></p> <ul style="list-style-type: none"> <li>Victim, target (based on e.g., ICA-W, EHE, NAQ-R)</li> </ul> <p><b>Subcategory bystander role witness</b></p> <ul style="list-style-type: none"> <li>See, observe, meaning (based on e.g., Injustice scale, POPS)</li> </ul> <p><b>Subcategory bystander role assistant</b></p> <ul style="list-style-type: none"> <li>Willingness to encourage, join in, or aid a bully in bullying others (based on BPBQ, SVI)</li> </ul> <p><b>Subcategory bystander role defender</b></p> <ul style="list-style-type: none"> <li>Participation in behaviors related to defending on behalf of a victim (BPBQ)</li> </ul> <p><b>Subcategory bystander role outsider</b></p> <ul style="list-style-type: none"> <li>Chooses to actively ignore it (based on BPBQ, SVI, monitor social safety)</li> </ul> |

**TABLE 5.** Dimensions Actor Types & Roles, Subcategories
