# Supplementary material for: Beyond Bullying, Aggression, Discrimination, Social Safety: Development of an Integrated Negative Work Behavior Questionnaire (INWBQ)
Source: Preprints.org preprint supplement (doi:10.20944/preprints202305.1852.v1), 2023-05-26
Supplement: Supplementary file 6 [file supplementary]

Archive with 7 entries (7 files):
- TABLE 6 INWBQ .pdf
- FIGURE 1 Development INWBQ.pdf
- TABLE 1. 44 construct instruments 16 studies on digital NWB, and 32 studies on harm.pdf
- TABLE 2. Dimensions INWBQ.pdf
- TABLE 3 Dimension Material NWB, Subcategories Property and Displays, Ranking.xlsx
- TABLE 4 Dimension Mental harm, Subcategory Temporarily mental complaints, Ranking.xlsx
- TABLE 5 Dimensions Actor Types & Roles, Subcategories.pdf
