# Supplementary material for: Beyond Bullying, Aggression, Discrimination, Social Safety: Development of an Integrated Negative Work Behavior Questionnaire (INWBQ)
Source: Preprints.org preprint supplement (doi:10.20944/preprints202305.1852.v1), 2023-05-26
Supplement: Supplementary file 6 [file supplementary › TABLE 3 Dimension Material NWB, Subcategories Property and Displays, Ranking.xlsx]

## Sheet: Blad1
TABLE 3		Dimension Material NWB		7 Material NWBs (41 before reduction)				ranking for
Construct	instrument					items	reduced	item selection
		Subcategory Property		double barreled and multiple choice items separately included in red
				1.Theft of property based on:		14	1	1
Deviance	I&O deviance scale	Material	Property	Taken property from work without permission
CWB	CWB-C	Material	Property	10. Stolen something belonging to your employer
CWB	CWB-C	Material	Property	22. Took supplies or tools home without permission
CWB	CWB-C	Material	Property	25. Took money from your employer without permission
CWB	CWB-C	Material	Property	32. Stole something belonging to someone at work
Terror	Cyber stalking	Material	Property	Property interference
Victimization/scapegoating	JVQ	Material	Property	C2) Personal Theft. In the last year, did anyone steal something from you and never give it back? Things like a backpack, money, watch, clothing, bike, stereo,or anything else?
Incivility	UWBQ	Material	Property	Took stationery from your desk without later returning it.
Incivility	UWBQ	Material	Property	Took items from your desk without prior permission.
Social safety	SVI	Material	Property	39. Theft of goods
Bullying	BPBQ	Material	Property	9. I have stolen things from another student
Victimization/scapegoating	PVS	material	Property	3.Stole your possessions
Aggression	FSS	Material	Property	24.Intentionally destroyed, stolen, or sabotaged your work materials
Aggression	IAS-T	Material	Property	34. Took or damaged something that belonged to them
				2.Destruction of property based on:		12	1	2
Aggression	Cyber aggression	Material	Property	Q12 How many times did you experiene...s) Have your personal property or workplace property damaged by someone
CWB	CWB-C	Material	Property	8. Purposely damaged a piece of equipment or property
CWB	CWB-C	Material	Property	41. Destroyed property belonging to someone at work
Terror	LIPT	Material	Property	43. Causing general damages that create financial costs to you.
Victimization/scapegoating	JVQ	Material	Property	C3) Vandalism. In the last year, did anyone break or ruin any of your things on purpose?
Terror	LIPT	Material	Property	44. Damaging your workplace or home.
Social safety	SVI	Material	Property	38. Destruction of goods
Bullying	BPBQ	Material	Property	10. I have damaged or broken something that was another student’s
Bullying	EAPA-T-R	Material	Property	9 The things (documents, material) I need to be able to work have been damaged or altered
Agressie	FSS	Material	Property	24.Intentionally destroyed, stolen, or sabotaged your work materials
Aggression	FSS	Material	Property	Purposely damaged company property
Aggression	IAS-T	Material	Property	34. Took or damaged something that belonged to them
Social safety	SVI	Material	Property	3.Arson		1	1	6
				4.Burglary based on		2	1	5
Victimization/scapegoating	JVQ	Material	Property	W5) Burglary did anyone steal something from your house that belongs to your family or someone you live with? Things like a TV, stereo, car, or anything else?
Incivility	UWBQ	Material	Property	Opened your desk drawers without prior permission.
				5.Fraud based on:		6	1	3
Social safety	SVI	Material	Property	48. Fraud
Deviance	I&O deviance scale	Material	Property	Falsified a receipt to get reimbursed for more money than you spent on business expenses
Deviance	I&O deviance scale	Material	Property	Dragged out work in order to get overtime
Aggression	FSS	Material	Property	Called in sick to work when you were not sick
CWB	CWB-C	Material	Property	24. Put in to be paid for more hours than you worked
CWB	CWB-C	Material	Property	7. Stayed home from work and said you were sick when you weren’t
				6.Littered property based on:		3	1	4
Deviance	I&O deviance scale	Material	Property	Littered your work environment
CWB	CWB-C	Material	Property	1. Purposely wasted your employer’s materials/supplies
CWB	CWB-C	Material	Property	9. Purposely dirtied or littered your place of work
		Subcategory Material displays
				18.distributing malicious material as dirty pictures or stories		3	1
Harassment/ discrimination	SEQ	Material	Displays	F2 Displayed or distributed dirty pictures or stories (e.g., nude pictures)
Terror	Cyber stalking	Material	Displays	Distribution of malicious material
Social safety	Mon soc safety	Material	Displays	Met seksueel grensoverschrijdend gedrag in de vorm van het verspreiden van seksuele afbeeldingen ( by distributing sexual posts as transgressive behavior)
						41	7
