# Supplementary figures and images for: Beyond Bullying, Aggression, Discrimination, Social Safety: Development of an Integrated Negative Work Behavior Questionnaire (INWBQ)
Source: Preprints.org preprint supplement (doi:10.20944/preprints202305.1852.v1), 2023-05-26

**FIGURE 1.**

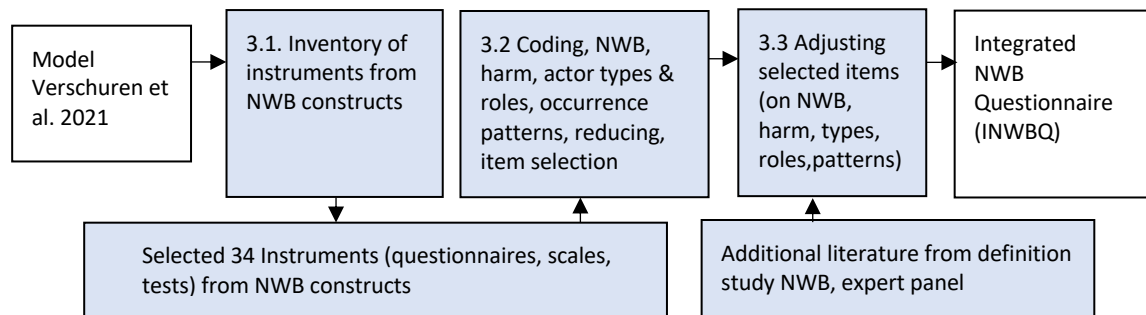

**FIGURE 1.** Development INWBQ

Supplement: Supplementary file 4 [file supplementary]
